# Supplementary material for: EpICC: A Bayesian neural network model with uncertainty correction for a more accurate classification of cancer
Source: PubMed Central journal article supplement (PMC9418241; doi:10.1038/s41598-022-18874-6), 2022-08-26
Supplement: 41598_2022_18874_MOESM2_ESM.pdf [file 41598_2022_18874_MOESM2_ESM.pdf]

## **Supplementary material**

### **EpICC: A Bayesian Neural Network model with uncertainty correction for a more accurate classification of cancer**

Prasoon Joshi, Riddhiman Dhar

This PDF file contains

**Figures S1 to S7**

**Tables S1 to S4**

# Figure S1

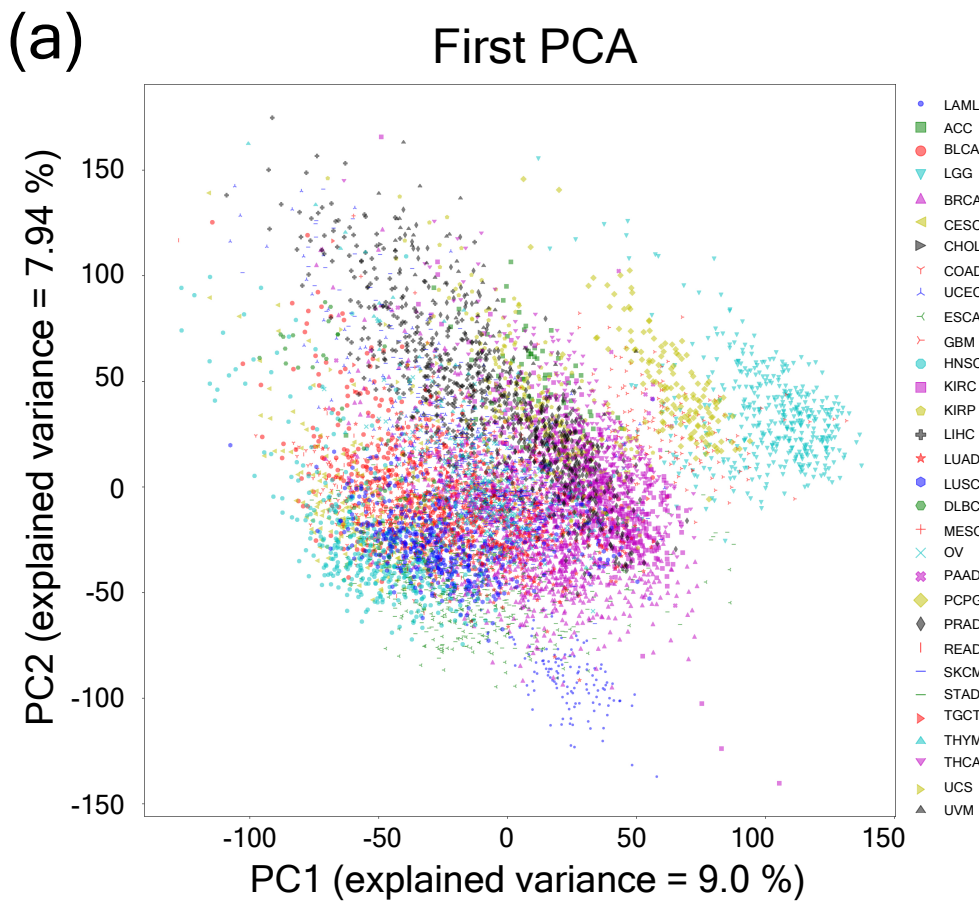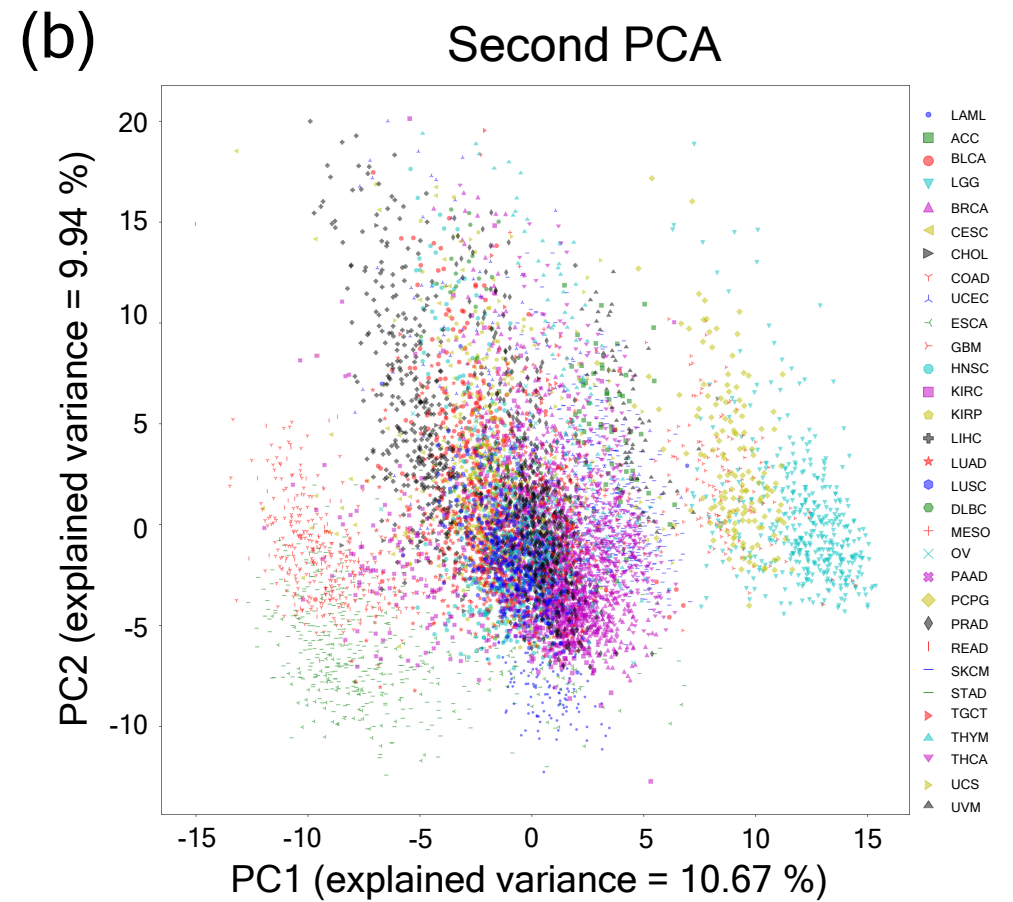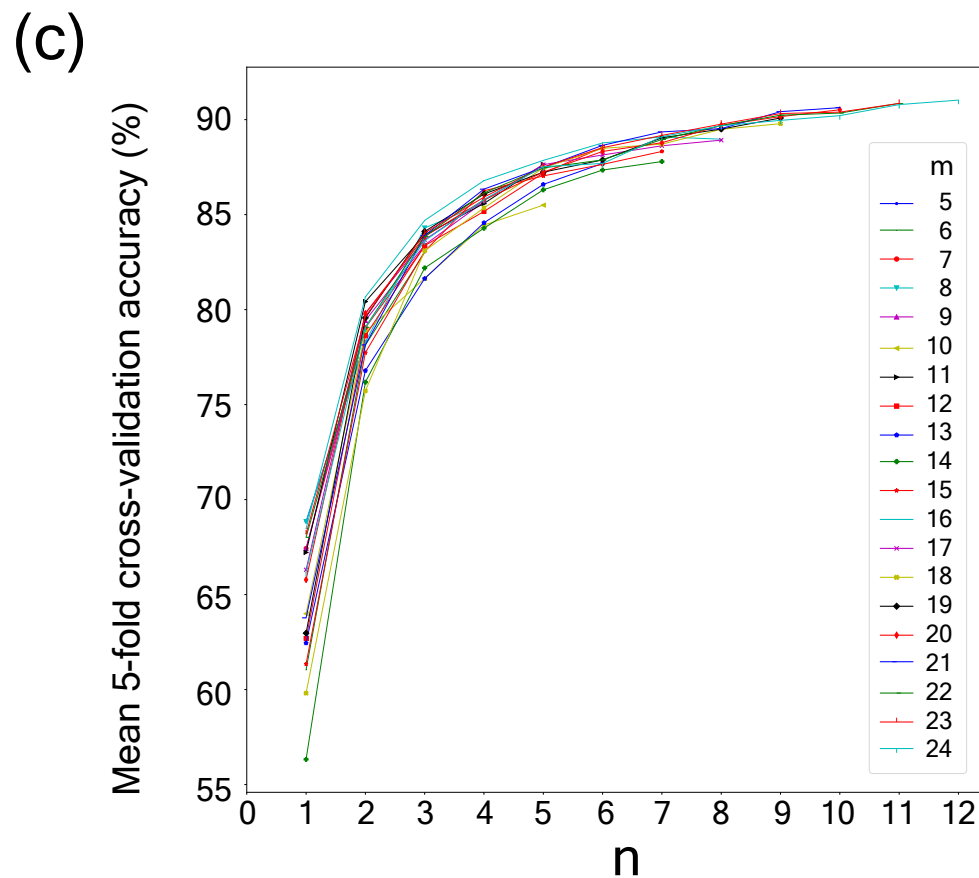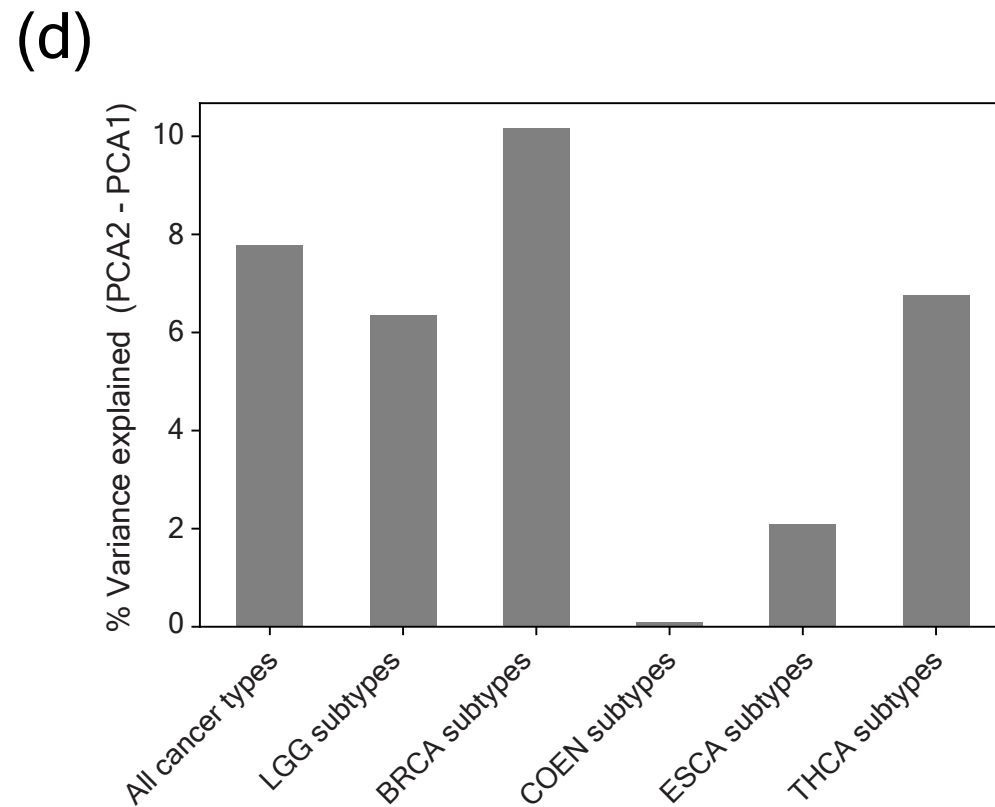

Figure S2

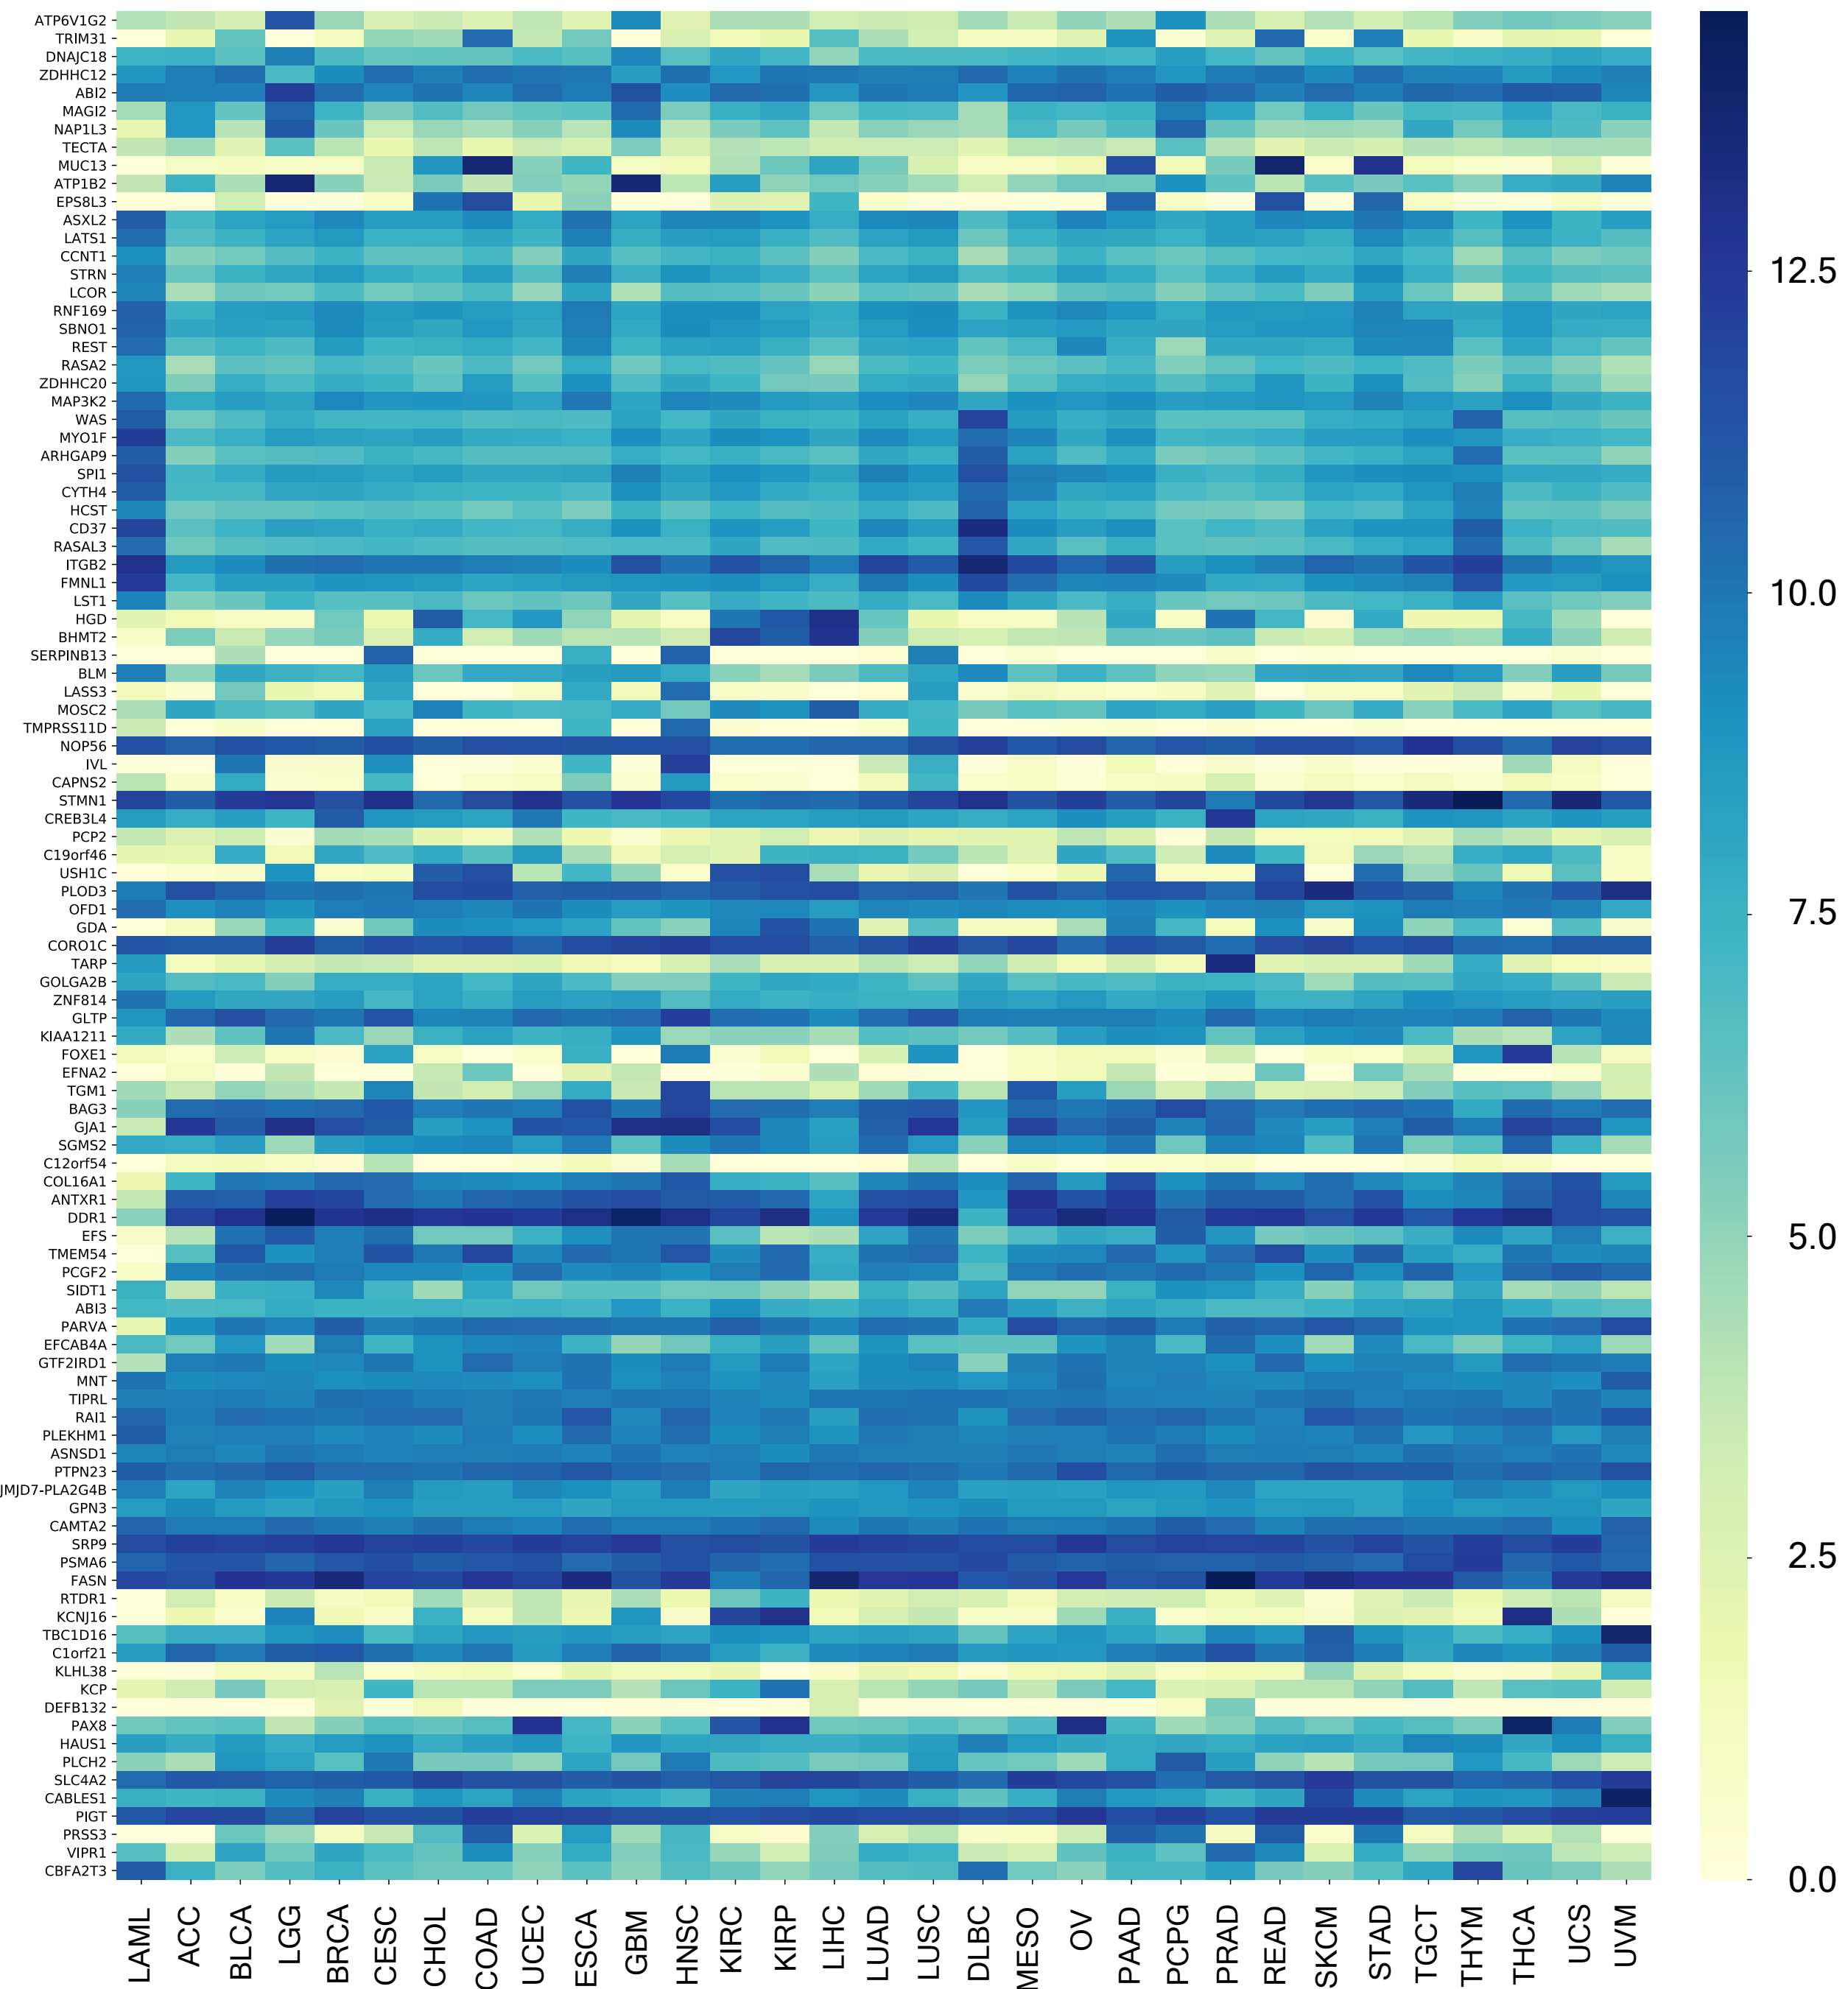

Figure S3

(a) Precision

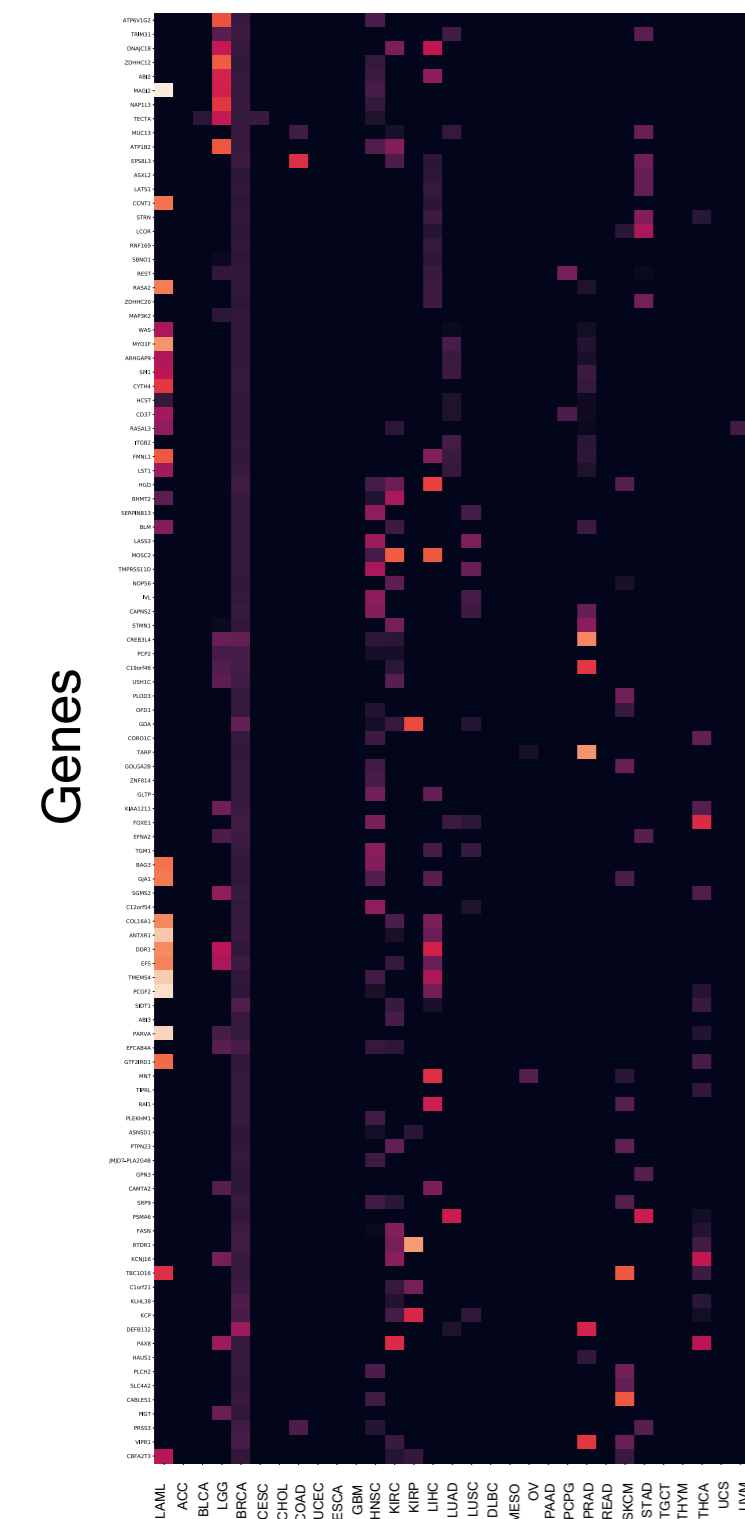

Cancer types

(b) Recall

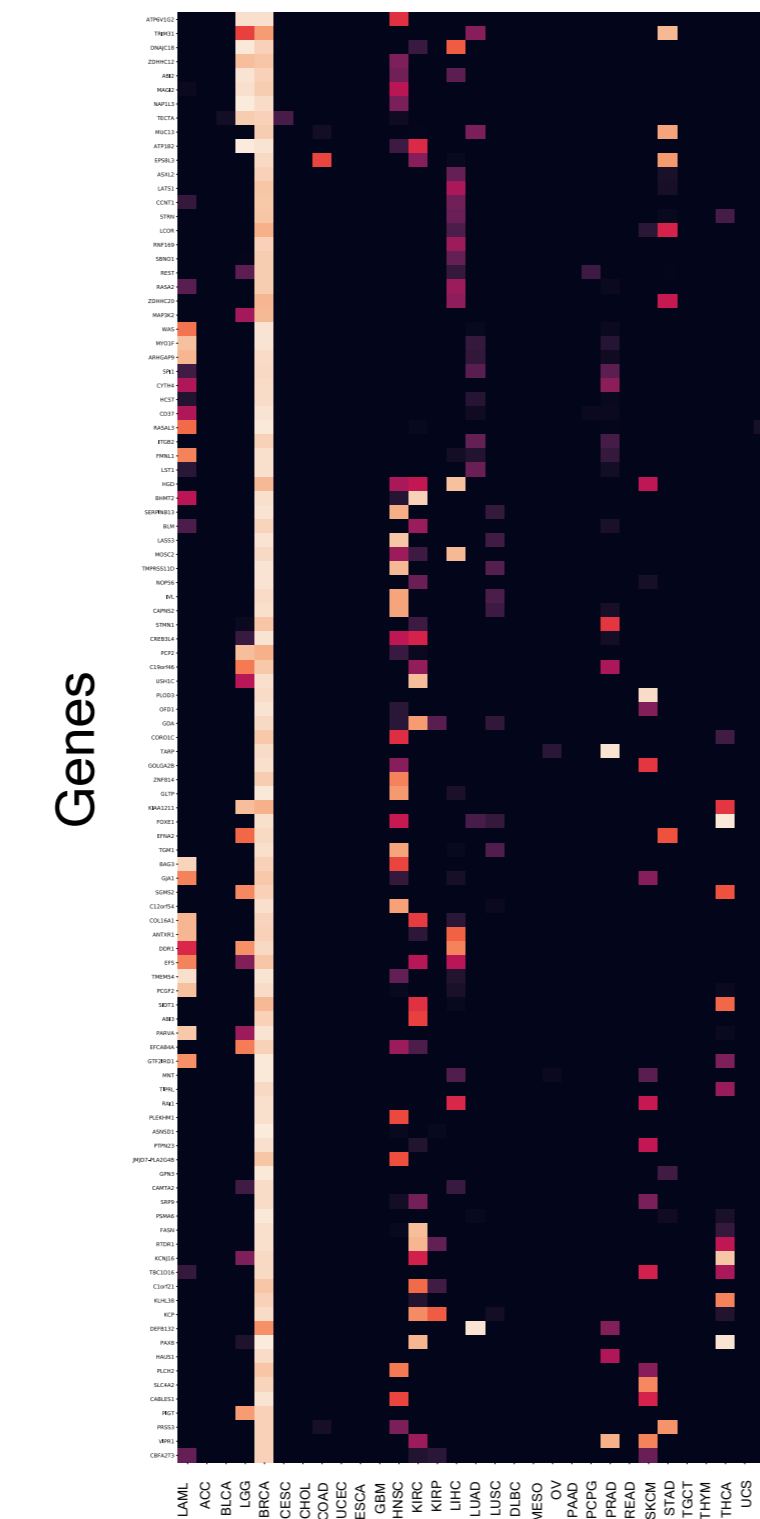

Cancer types

(c) F1 score

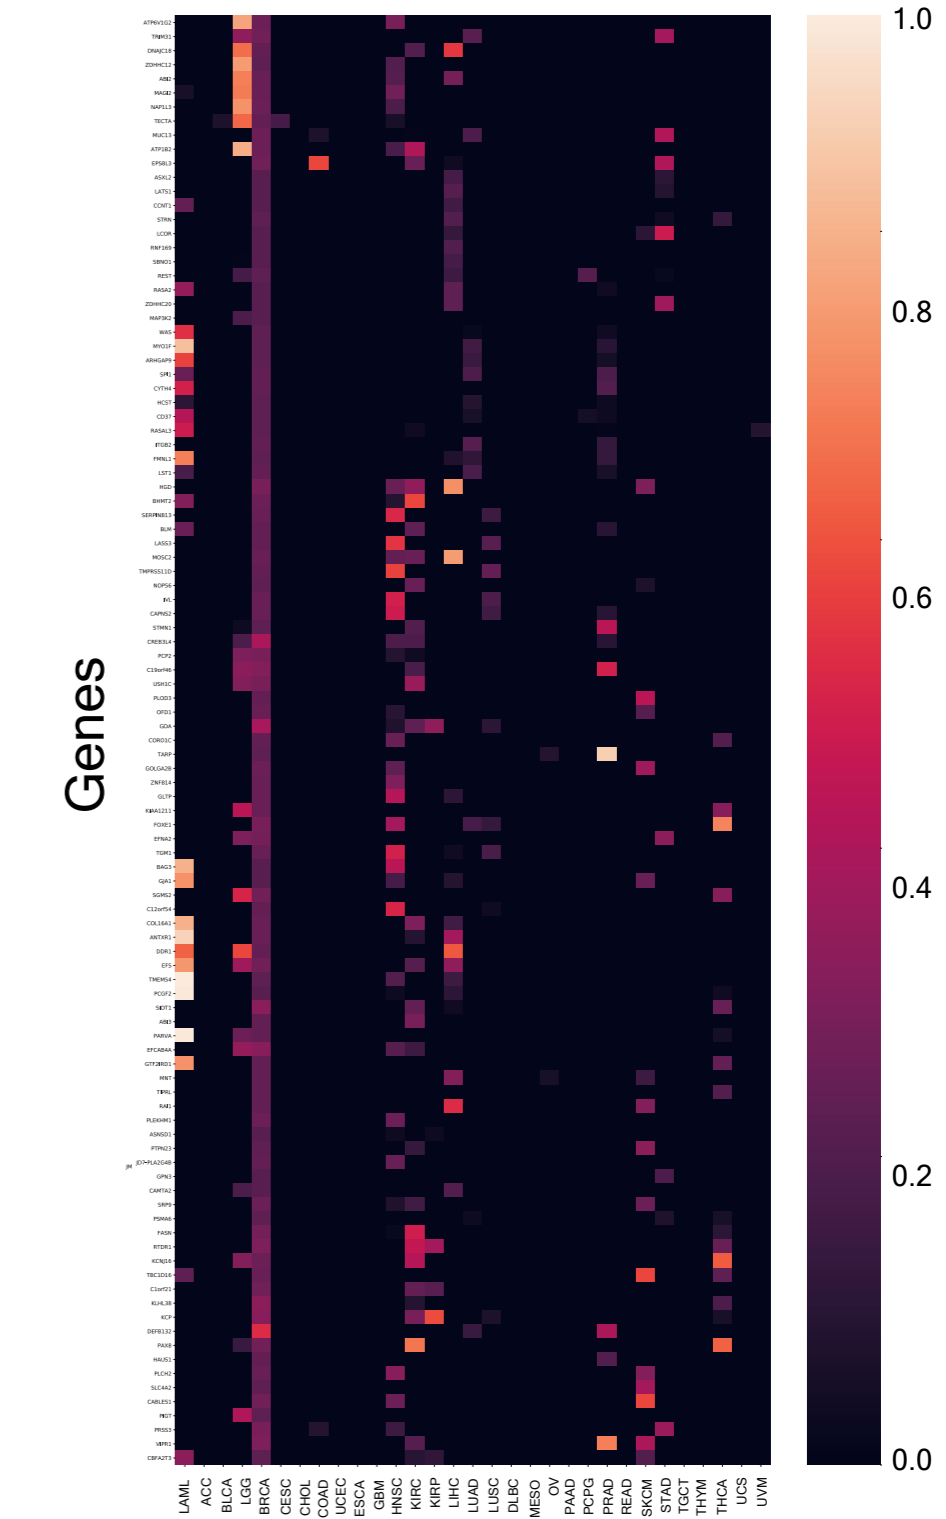

Cancer types

Figure S4

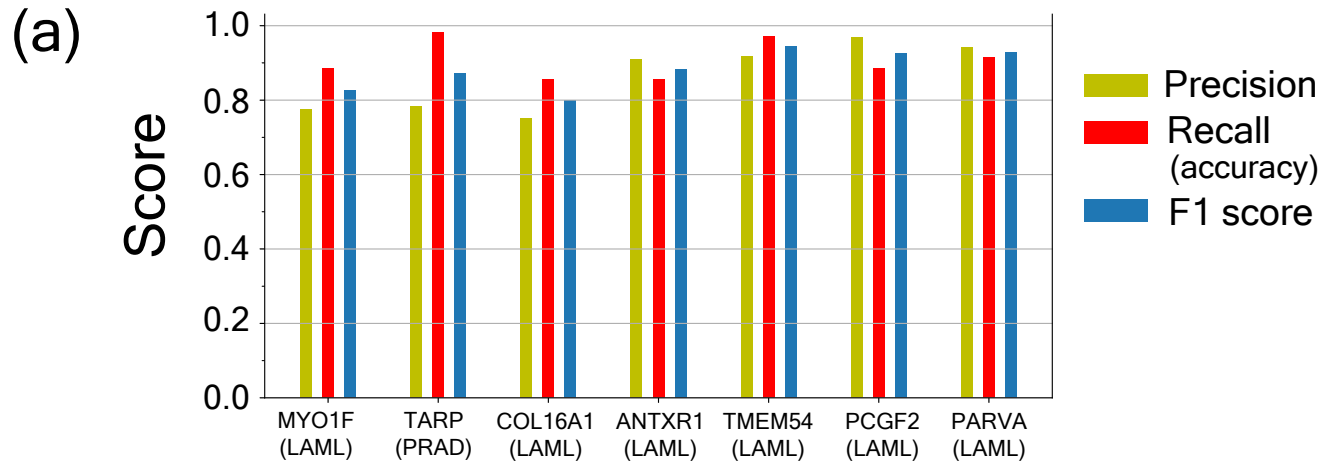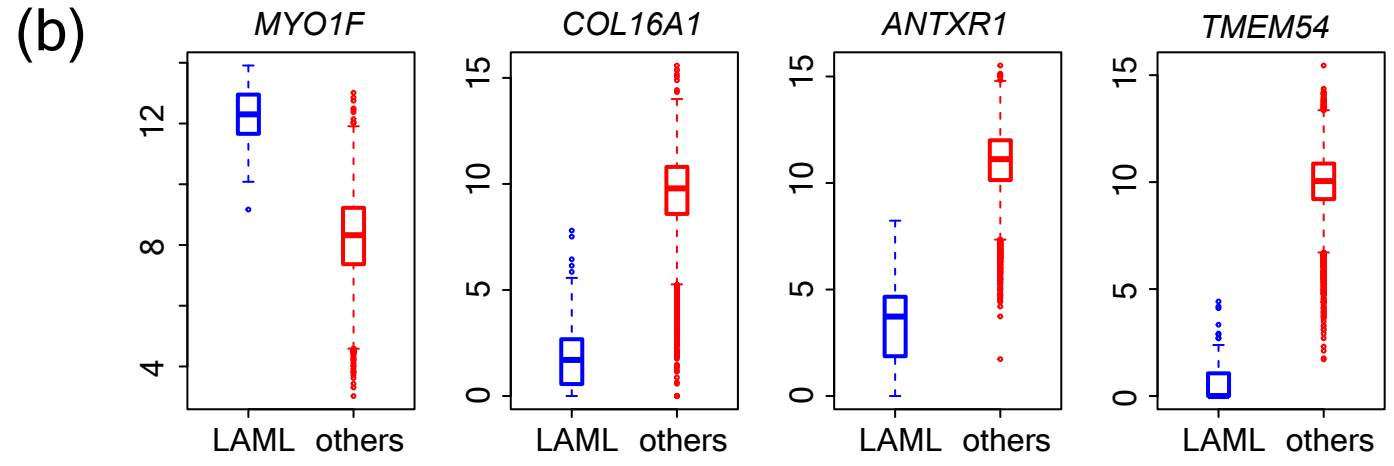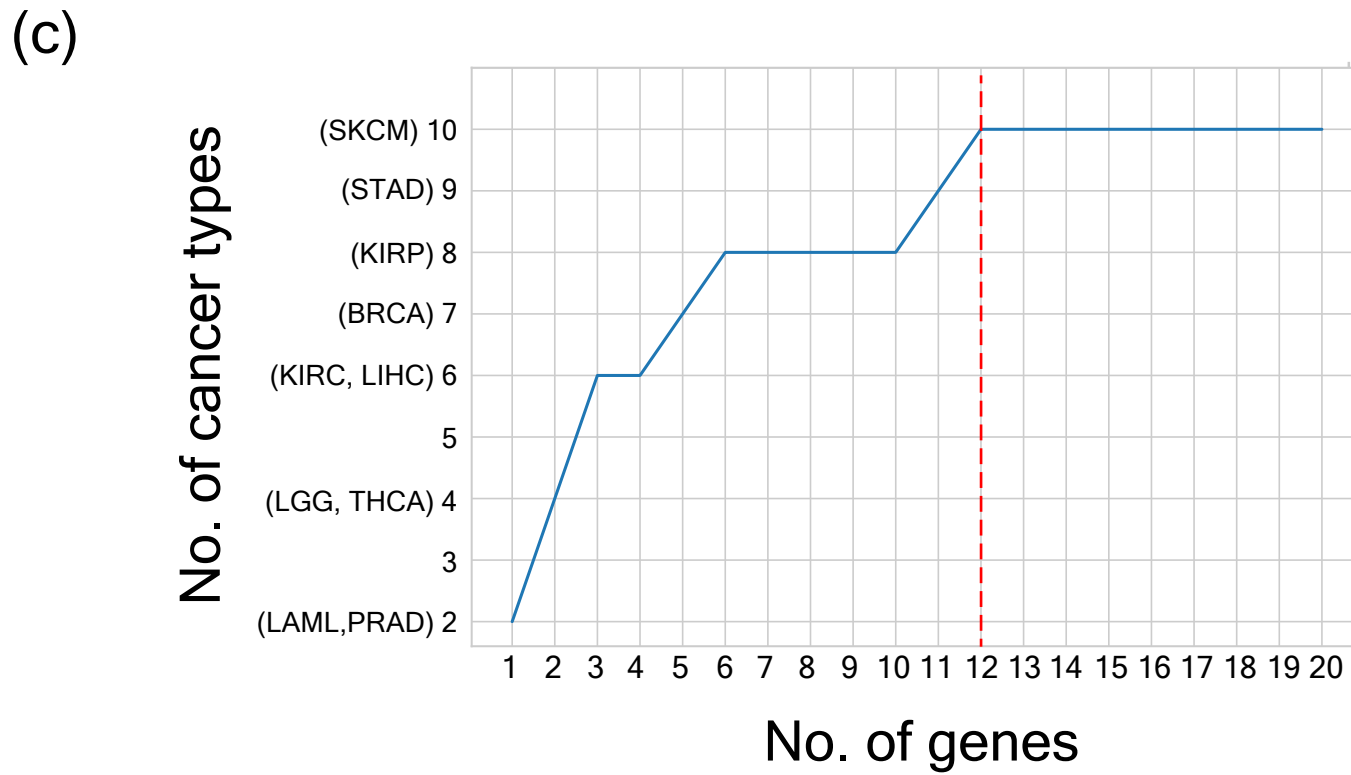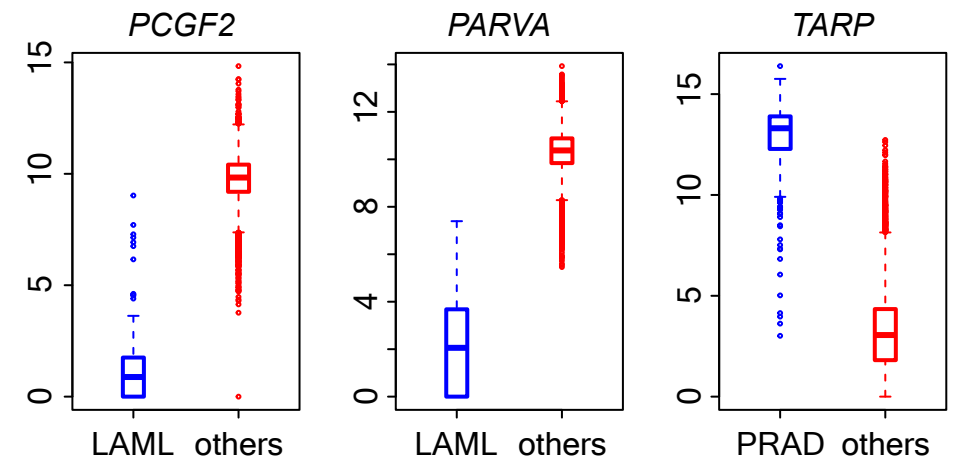

# Figure S5

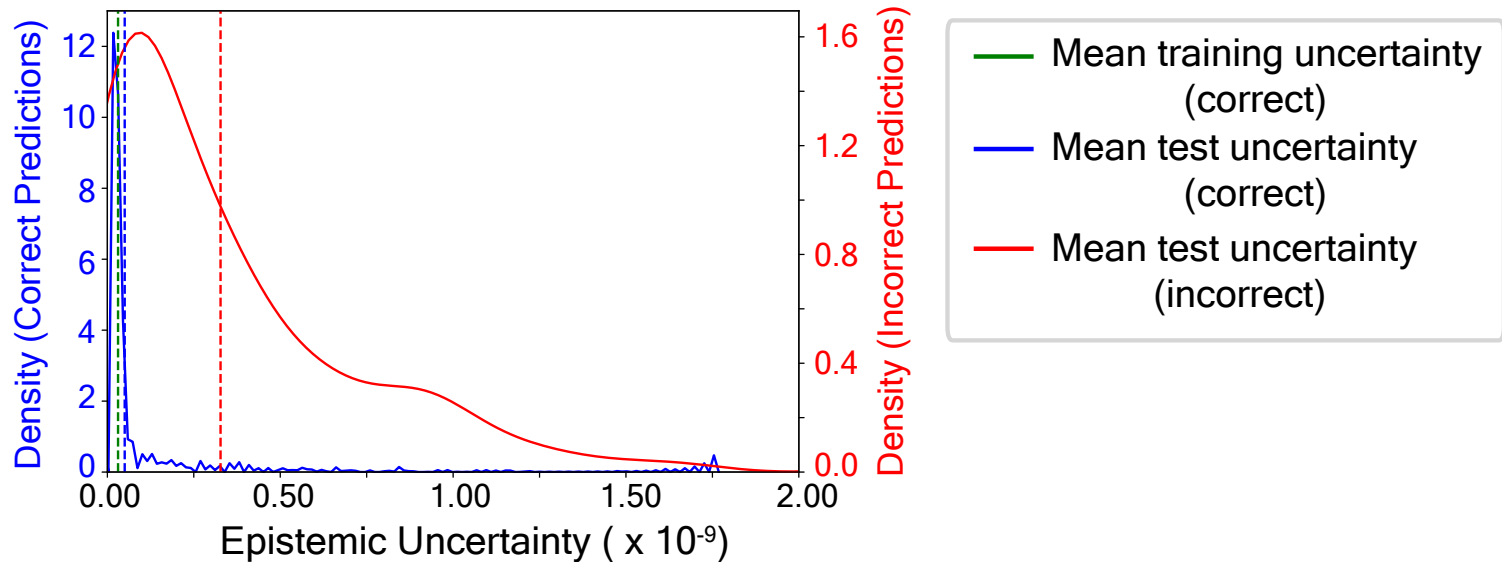

Figure S6

LGG subtypes

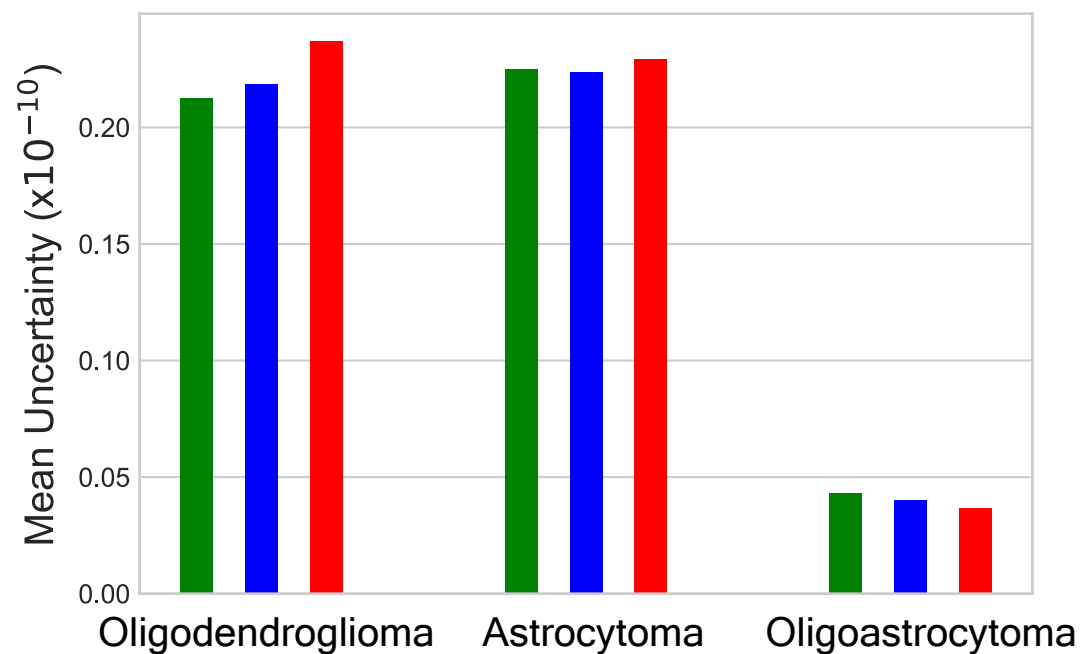

BRCA subtypes

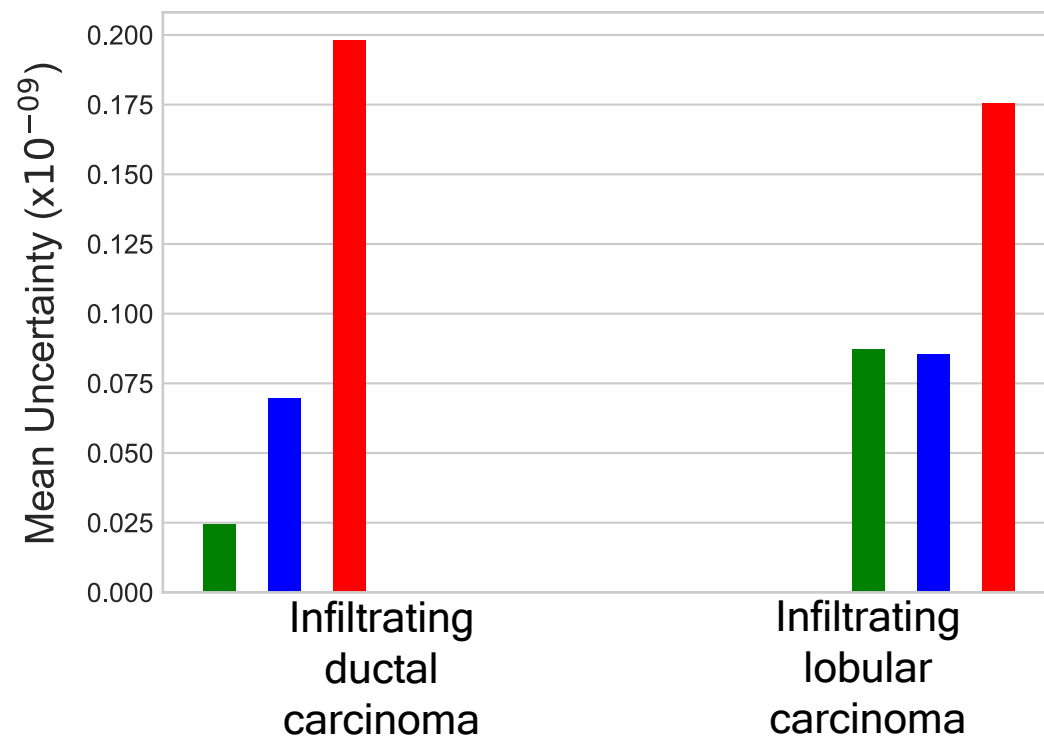

ESCA subtypes

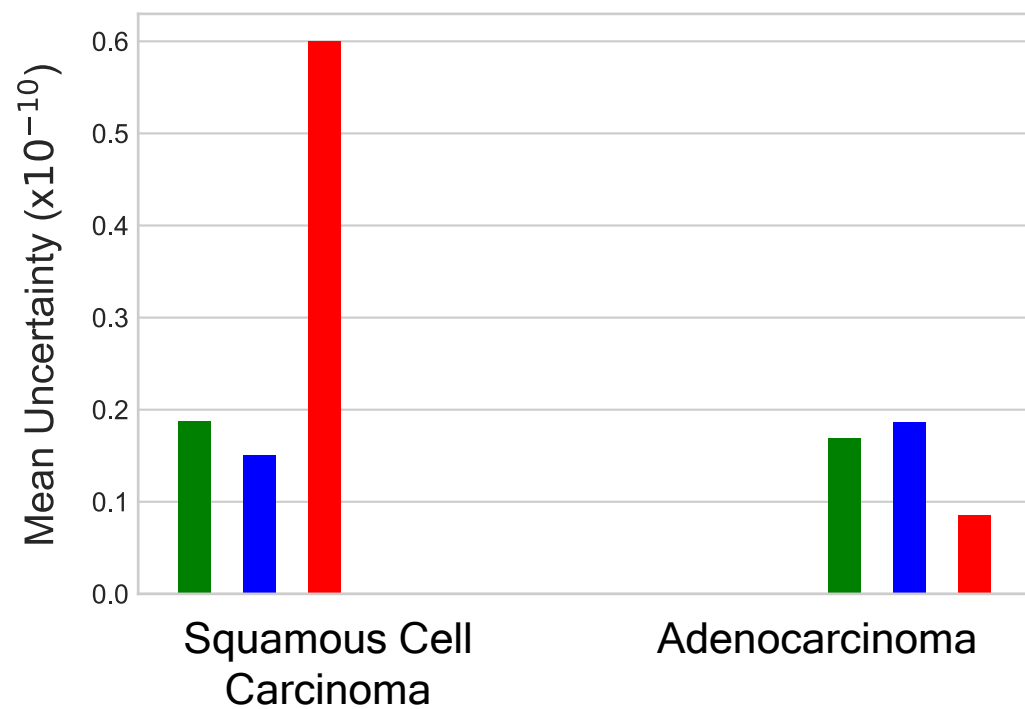

THCA subtypes

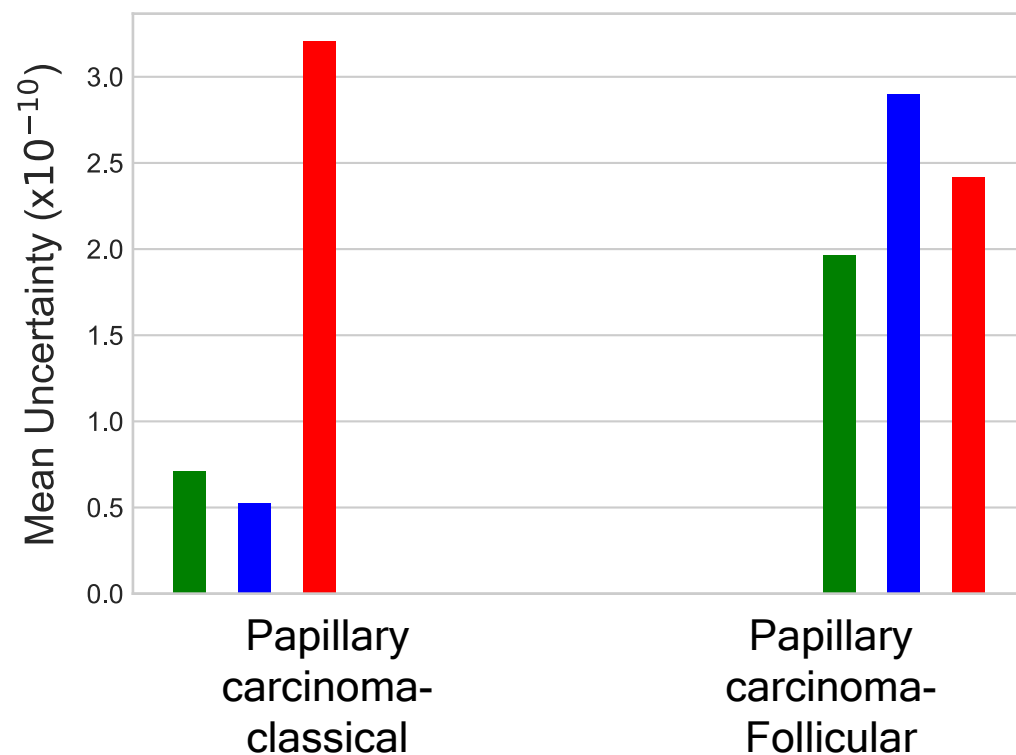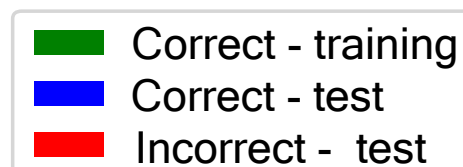

Figure S7

LGG Subtypes

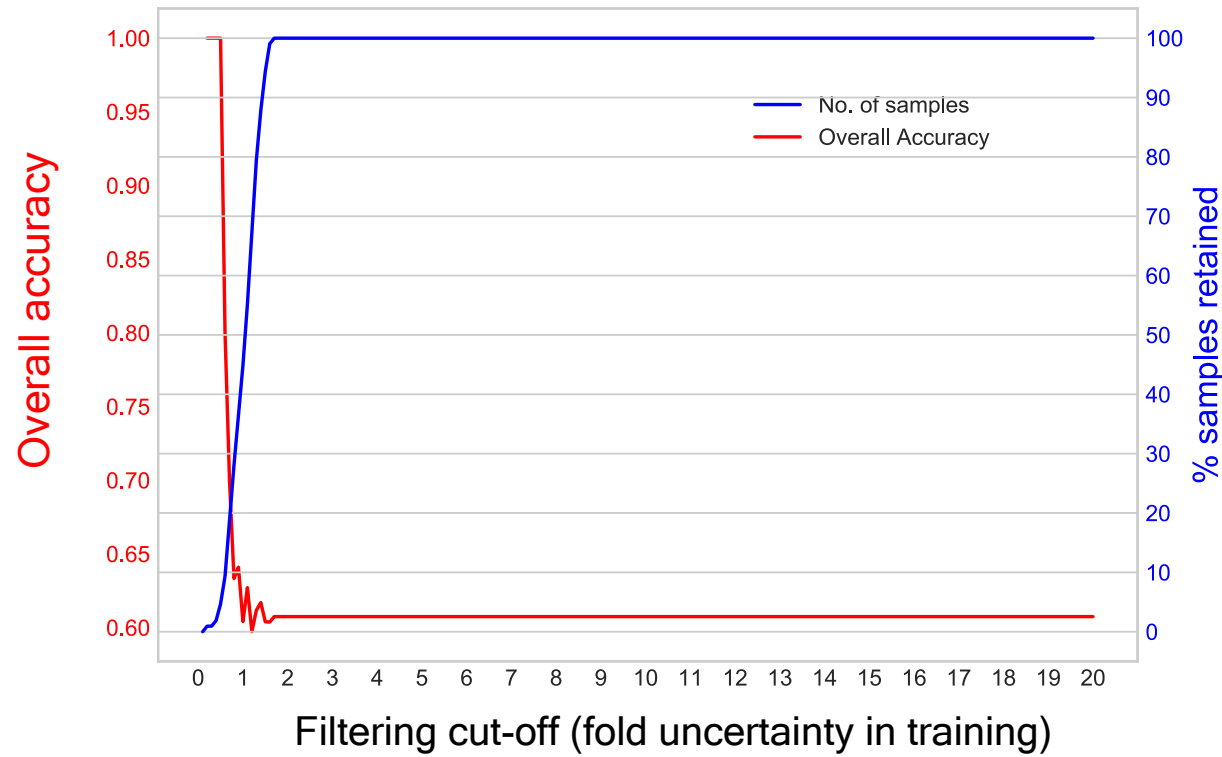

BRCA Subtypes

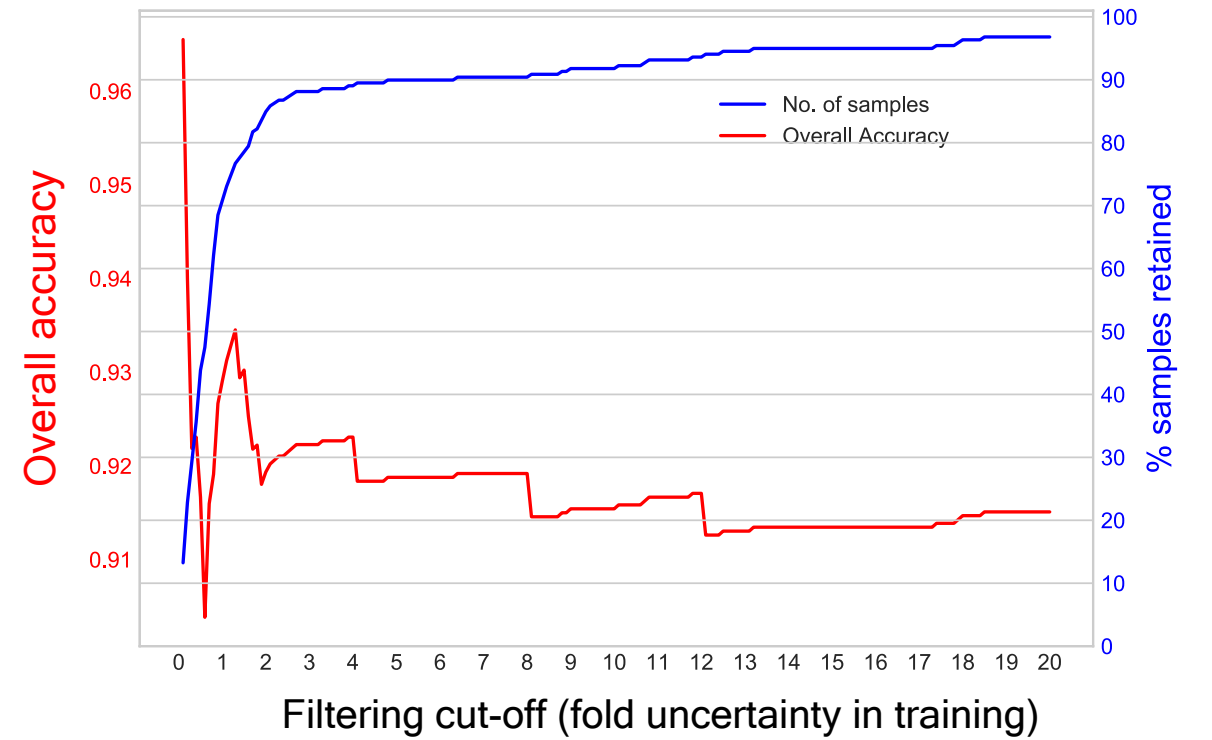

ESCA Subtypes

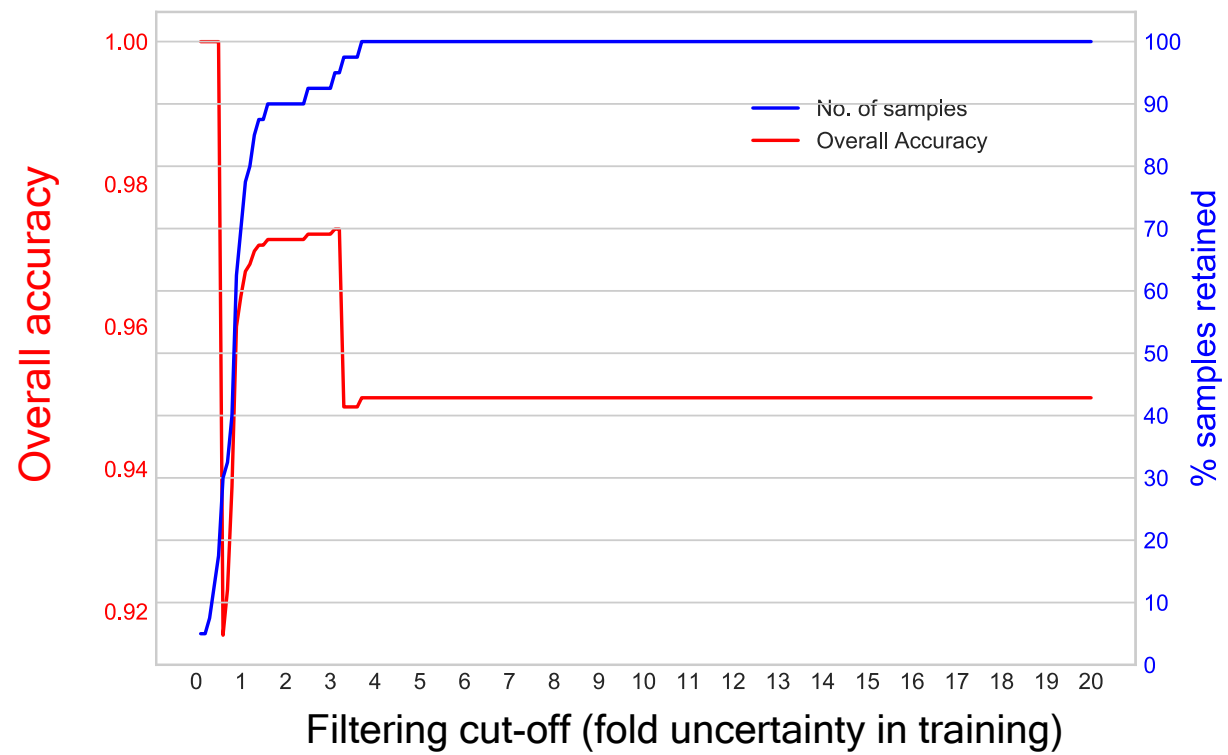

THCA Subtypes

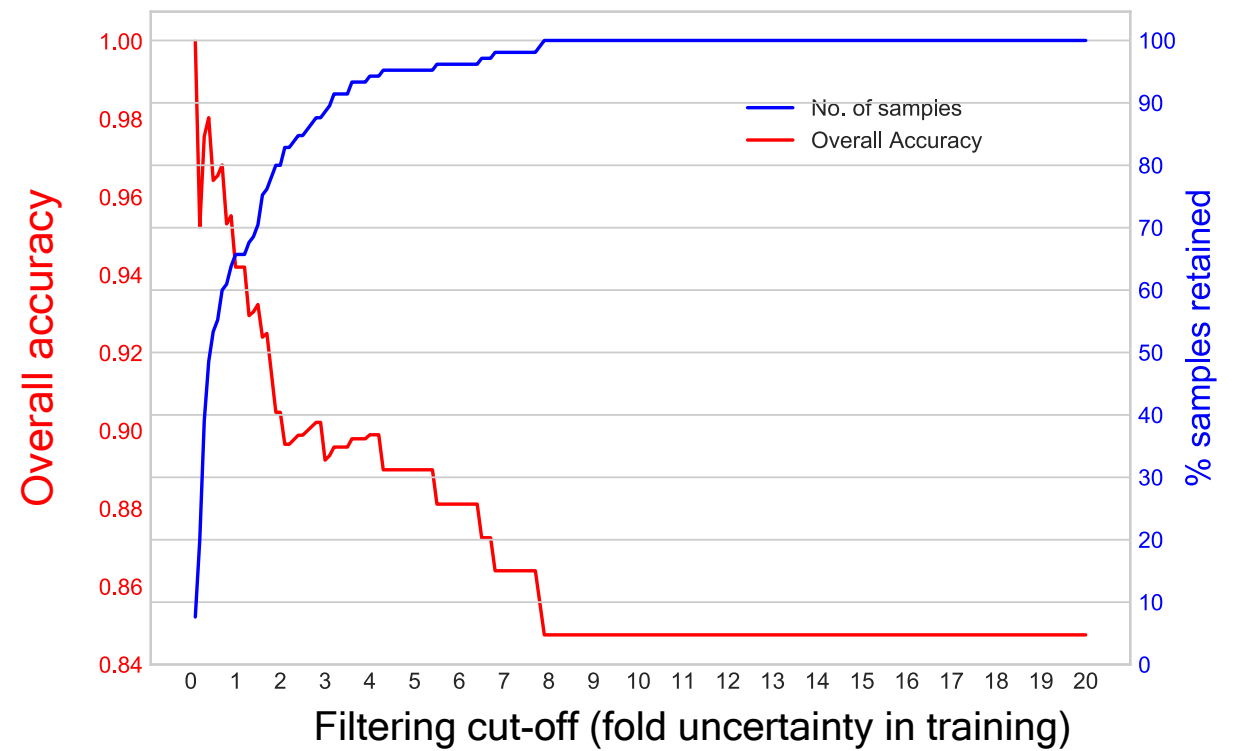



**Table S1 - Details of 103 feature genes**

| S. No. | Gene     | Description                                                           | Function                                                                                                                                                                                                                                              | Reported Oncogenic? (Y/N)                                                              | Reported tumor suppressor? (Y/N)                                             | Biomarker/Other association with cancer? (Y/N)                                               |
|--------|----------|-----------------------------------------------------------------------|-------------------------------------------------------------------------------------------------------------------------------------------------------------------------------------------------------------------------------------------------------|----------------------------------------------------------------------------------------|------------------------------------------------------------------------------|----------------------------------------------------------------------------------------------|
| 1      | ABI2     | Abl interactor 2                                                      | Actin polymerization/depolymerization, cell migration, cytoskeleton organization                                                                                                                                                                      | N                                                                                      | Y (Dai and Pendergast, 1995)                                                 | N                                                                                            |
| 2      | ABI3     | ABI family member 3                                                   | Regulation of actin polymerization, cell migration                                                                                                                                                                                                    | N                                                                                      | Y (Latini <i>et al.</i> , 2011; Moraes <i>et al.</i> , 2016)                 | N                                                                                            |
| 3      | ANTXR1   | ANTXR cell adhesion molecule 1                                        | Role in cell attachment and migration, interacts with extracellular matrix proteins and with the actin cytoskeleton.                                                                                                                                  | N                                                                                      | N                                                                            | Y (Chen <i>et al.</i> , 2013; Geng <i>et al.</i> , 2019)                                     |
| 4      | ARHGAP9  | Rho GTPase activating protein 9                                       | GTPase activator for the Rho-type GTPases                                                                                                                                                                                                             | N                                                                                      | Y (Piao <i>et al.</i> , 2020)                                                | Y (Piao <i>et al.</i> , 2020)                                                                |
| 5      | ASNSD1   | Asparagine synthetase domain containing 1                             | Asparagine synthetic pathway                                                                                                                                                                                                                          | N                                                                                      | N                                                                            | N                                                                                            |
| 6      | ASXL2    | ASXL transcriptional regulator 2                                      | Epigenetic regulators that bind various histone-modifying enzymes and involved in the assembly of transcription factors. Mutations in this gene are associated with cancer in several tissues (breast, bladder, pancreas, ovary, prostate, and blood) | Putative (Park <i>et al.</i> , 2016; Cui <i>et al.</i> , 2020)                         | Y (Daou <i>et al.</i> , 2015; Micol <i>et al.</i> , 2017)                    | Y (Park <i>et al.</i> , 2016; Cui <i>et al.</i> , 2020)                                      |
| 7      | ATP1B2   | ATPase Na <sup>+</sup> /K <sup>+</sup> Transporting Subunit Beta 2    | Non-catalytic component of Na <sup>+</sup> -K <sup>+</sup> -ATPase                                                                                                                                                                                    | Putative (Li <i>et al.</i> , 2019)                                                     | Putative (van den Boome <i>et al.</i> , 2006; Demircan <i>et al.</i> , 2009) | N                                                                                            |
| 8      | ATP6V1G2 | ATPase H <sup>+</sup> Transporting V1 Subunit G2                      | Component of vacuolar ATPase (V-ATPase) that is responsible for acidification of intracellular compartment                                                                                                                                            | N                                                                                      | N                                                                            | Y (Sennoune <i>et al.</i> , 2004; Xu <i>et al.</i> , 2013; Terrasi <i>et al.</i> , 2019)     |
| 9      | BAG3     | BAG Cochaperone 3                                                     | Co-chaperone for HSP70 and HSC70 chaperone proteins, has anti-apoptotic activity                                                                                                                                                                      | Y (Chiappetta <i>et al.</i> , 2007; Shi <i>et al.</i> , 2018; Li <i>et al.</i> , 2018) | Y (Kong <i>et al.</i> , 2016)                                                | N                                                                                            |
| 10     | BHMT2    | Betaine--Homocysteine S-Methyltransferase 2                           | Regulation of homocysteine metabolism, converts homocysteine to methionine using S-methylmethionine (SMM) as a methyl donor                                                                                                                           | N                                                                                      | N                                                                            | Putative (Dufresne <i>et al.</i> , 2019)                                                     |
| 11     | BLM      | Bloom Syndrome RecQ Like Helicase                                     | TP-dependent DNA helicase that unwinds single- and double-stranded DNA, participates in DNA replication and repair                                                                                                                                    | N                                                                                      | Y (Payne and Hickson, 2009; de Voer <i>et al.</i> , 2015)                    | Y (Arora <i>et al.</i> , 2015)                                                               |
| 12     | C12orf54 | Chromosome 12 Open Reading Frame 54                                   | -                                                                                                                                                                                                                                                     | N                                                                                      | N                                                                            | N                                                                                            |
| 13     | C19orf46 | SYNE4 (Spectrin Repeat Containing Nuclear Envelope Family Member 4)   | component of the LINC (Linker of Nucleoskeleton and Cytoskeleton) complex, involved in the connection between the nuclear lamina and the cytoskeleton                                                                                                 | N                                                                                      | N                                                                            | Y (Xu <i>et al.</i> , 2020)                                                                  |
| 14     | C1orf21  | Chromosome 1 Open Reading Frame 21                                    | Cell Proliferation-Inducing Gene 13                                                                                                                                                                                                                   | N                                                                                      | N                                                                            | Y (Hannemann <i>et al.</i> , 2006; Lee <i>et al.</i> , 2007; Yoshihara <i>et al.</i> , 2015) |
| 15     | CABLES1  | CDK5 And ABL1 Enzyme Substrate 1                                      | Cyclin-dependent kinase binding protein. Enhances cyclin-dependent kinase tyrosine phosphorylation by nonreceptor tyrosine kinases, such as that of CDK5 by activated ABL1                                                                            | N                                                                                      | Y (Armason <i>et al.</i> , 2013; Shi <i>et al.</i> , 2015)                   | Putative (Huang <i>et al.</i> , 2017)                                                        |
| 16     | CAMTA2   | Calmodulin-Binding Transcription Activator 2                          | Calmodulin-binding transcription activator protein                                                                                                                                                                                                    | Putative (Luan <i>et al.</i> , 2019)                                                   | N                                                                            | N                                                                                            |
| 17     | CAPNS2   | Calcium-Dependent Protease Small Subunit 2                            | Calcium-regulated non-lysosomal thiol-protease                                                                                                                                                                                                        | N                                                                                      | N                                                                            | N                                                                                            |
| 18     | CBFA2T3  | Core-Binding Factor, Runt Domain, Alpha Subunit 2; Translocated To, 3 | Transcriptional corepressor, facilitates transcriptional repression via association with DNA-binding transcription factors and recruitment of other corepressors and histone-modifying enzymes                                                        | Y (Masetti <i>et al.</i> , 2019)                                                       | Y (Kochetkova <i>et al.</i> , 2002)                                          | N                                                                                            |
| 19     | CCNT1    | Cyclin T1                                                             | Regulatory subunit of the cyclin-dependent kinase pair (CDK9/cyclin-T1) complex                                                                                                                                                                       | Y (Moiola <i>et al.</i> , 2010)                                                        | N                                                                            | N                                                                                            |
| 20     | CD37     | CD37 Molecule                                                         | Leukocyte antigen CD37                                                                                                                                                                                                                                | N                                                                                      | Y (de Winde <i>et al.</i> , 2016; Schaper and van Spruiel, 2018)             | Y (Zhang <i>et al.</i> , 2020)                                                               |
| 21     | COL16A1  | Collagen, Type XVI, Alpha 1                                           | Involved in cell attachment and cell spreading                                                                                                                                                                                                        | Y (Senner, 2008; Bauer, 2011; Ratzinger, 2011)                                         | N                                                                            | Y (Yoshihara <i>et al.</i> , 2015)                                                           |
| 22     | CORO1C   | Coronin, Actin-Binding Protein, 1C                                    | Role in directed cell migration by regulation of RAC1                                                                                                                                                                                                 | Y (Castagnino <i>et al.</i> , 2018; Cheng <i>et al.</i> , 2019)                        | N                                                                            | Y (Wu <i>et al.</i> , 2010; Cheng <i>et al.</i> , 2019; Wang <i>et al.</i> , 2020)           |
| 23     | CREB3L4  | Cyclic AMP-Responsive Element-Binding Protein 3-Like Protein 4        | Transcriptional activator that may play a role in the unfolded protein response                                                                                                                                                                       | Y (Chen <i>et al.</i> , 2010; Kim <i>et al.</i> , 2017)                                | N                                                                            | Y (Kim <i>et al.</i> , 2017)                                                                 |
| 24     | CYTH4    | Cytohesin 4                                                           | Promotes the activation of ARF factors                                                                                                                                                                                                                | N                                                                                      | N                                                                            | N                                                                                            |
| 25     | DDR1     | Discoidin Domain Receptor Tyrosine Kinase 1                           | Tyrosine kinase that functions as cell surface receptor for fibrillar collagen and regulates cell attachment to the extracellular matrix                                                                                                              | Y (Valiathan <i>et al.</i> , 2012; Hu <i>et al.</i> , 2014)                            | Y (Takai <i>et al.</i> , 2018)                                               | Y (Song <i>et al.</i> , 2016)                                                                |
| 26     | DEFB132  | Defensin Beta 132                                                     | Cysteine-rich cationic polypeptides that are important in the immunologic response to invading microorganisms                                                                                                                                         | N                                                                                      | N                                                                            | N                                                                                            |
| 27     | DNAJC18  | DnaJ Heat Shock Protein Family (Hsp40) Member C18                     | DNAJC18 (DnaJ Heat Shock Protein Family (Hsp40) Member C18)                                                                                                                                                                                           | N                                                                                      | N                                                                            | Y (Guey <i>et al.</i> , 2010; Pohl <i>et al.</i> , 2019)                                     |
| 28     | EFCAB4A  | EF-hand calcium binding domain 4A                                     | calcium ion binding                                                                                                                                                                                                                                   | N                                                                                      | N                                                                            | Y (Milani <i>et al.</i> , 2010)                                                              |

|    |               |                                                                                  |                                                                                                                                                                                             |                                                                              |                                                                                |                                                                        |
|----|---------------|----------------------------------------------------------------------------------|---------------------------------------------------------------------------------------------------------------------------------------------------------------------------------------------|------------------------------------------------------------------------------|--------------------------------------------------------------------------------|------------------------------------------------------------------------|
| 29 | EFNA2         | Ephrin A2                                                                        | Cell surface GPI-bound ligand for Eph receptors, a family of receptor tyrosine kinases crucial for migration, repulsion and adhesion during neuronal, vascular and epithelial development   | N                                                                            | N                                                                              | N                                                                      |
| 30 | EFS           | Embryonal Fyn-Associated Substrate                                               | Central coordinating role for tyrosine-kinase-based signaling related to cell adhesion                                                                                                      | N                                                                            | Y (Sertkaya et al., 2015)                                                      | Y (Neumann et al., 2011)                                               |
| 31 | EPS8L3        | Epidermal Growth Factor Receptor Pathway Substrate 8-Related                     | Epidermal growth factor receptor pathway substrate 8 (EPS8), a substrate for the epidermal growth factor receptor.                                                                          | Y (Zeng et al., 2018; Li et al., 2019; Chen et al., 2020; Xuan et al., 2020) | N                                                                              | Y (Li et al., 2019)                                                    |
| 32 | FASN          | Fatty Acid Synthase                                                              | Catalyze the synthesis of palmitate from acetyl-CoA and malonyl-CoA, in the presence of NADPH, into long-chain saturated fatty acids                                                        | Y (Patel et al., 2015; Corominas-Faja et al., 2017)                          | N                                                                              | Y (Visca et al., 2004; Cruz et al., 2014; Ricklefs et al., 2020)       |
| 33 | FMNL1         | Formin Like 1                                                                    | Formin-related proteins have been implicated in morphogenesis                                                                                                                               | Putative (Chen et al., 2018)                                                 | N                                                                              | Y (Chen et al., 2018; Higa et al., 2019)                               |
| 34 | FOXE1         | Forkhead Box E1                                                                  | Forkhead family of transcription factors                                                                                                                                                    | Putative (Ma et al., 2019)                                                   | Y (Dai et al., 2020)                                                           | Y (Kallel et al., 2010; Papadia et al., 2014; Sugimachi et al., 2016)  |
| 35 | GDA           | Guanine Deaminase                                                                | Enzyme responsible for the hydrolytic deamination of guanine                                                                                                                                | N                                                                            | N                                                                              | N                                                                      |
| 36 | GJA1          | Gap Junction Protein Alpha 1                                                     | Gap junction protein - a gap junction consists of a cluster of pairs of transmembrane channels, the connexons, through which low MW materials diffuse                                       | N                                                                            | Y (Talhouk et al., 2013; Teleki et al., 2014; Naser Al Deen et al., 2019)      | Putative (Aasen et al., 2019)                                          |
| 37 | GLTP          | Glycolipid Transfer Protein                                                      | Involved in intermembrane transfer of glycolipids                                                                                                                                           | N                                                                            | Y (Mishra et al., 2019)                                                        | N                                                                      |
| 38 | GOLGA2B       | Golgin A2 Pseudogene 5                                                           | Pseudogene                                                                                                                                                                                  | N                                                                            | N                                                                              | N                                                                      |
| 39 | GPN3          | GPN-Loop GTPase 3                                                                | Small GTPase required for proper localization of RNA polymerase II                                                                                                                          | Putative (Lara-Chacón et al., 2019)                                          | N                                                                              | N                                                                      |
| 40 | GTF2IRD1      | GTF2I Repeat Domain Containing 1                                                 | Transcription regulator involved in cell-cycle progression and skeletal muscle differentiation                                                                                              | Y (Huo et al., 2016; Nambara et al., 2020)                                   | N                                                                              | N                                                                      |
| 41 | HAUS1         | HAUS Augmin Like Complex Subunit 1                                               | Mitotic spindle assembly, maintenance of centrosome integrity and completion of cytokinesis as part of the HAUS augmin-like complex                                                         | N                                                                            | N                                                                              | Y (Campregher et al., 2016)                                            |
| 42 | HCST          | Hematopoietic Cell Signal Transducer                                             | Transmembrane adapter protein forms an activation receptor KLRK1-HCST; KLRK1-HCST receptor plays a role in immune surveillance against tumors and is required for cytolysis of tumors cells | N                                                                            | N                                                                              | N                                                                      |
| 43 | HGD           | Homogentisate 1,2-Dioxygenase                                                    | Involved in the catabolism of the amino acids tyrosine and phenylalanine                                                                                                                    | N                                                                            | N                                                                              | N                                                                      |
| 44 | ITGB2         | Integrin Subunit Beta 2                                                          | participate in cell adhesion as well as cell-surface mediated signalling                                                                                                                    | N                                                                            | N                                                                              | Y (Laskowska et al., 2016; Peng et al., 2020)                          |
| 45 | IVL           | Involucrin                                                                       | Part of the insoluble cornified cell envelope (CE) of stratified squamous epithelia                                                                                                         | N                                                                            | N                                                                              | Y (Walts et al., 1985)                                                 |
| 46 | JMJD7-PLA2G4B | Jumonji Domain Containing 7-Phospholipase A2, Group IVB (Cytosolic) Read-Through | -                                                                                                                                                                                           | Y (Cheng et al., 2017)                                                       | N                                                                              | N                                                                      |
| 47 | KCNJ16        | Potassium Channel, Inwardly Rectifying Subfamily J Member 16                     | An integral membrane protein and inward-rectifier type potassium channel                                                                                                                    | N                                                                            | N                                                                              | Y (Adam et al., 2010; Jiang et al., 2017)                              |
| 48 | KCP           | Kielin/Chordin-Like Protein                                                      | Enhances bone morphogenetic protein (BMP) signaling                                                                                                                                         | N                                                                            | N                                                                              | N                                                                      |
| 49 | KIAA1211      | -                                                                                | Uncharacterized                                                                                                                                                                             | Y (Liu et al., 2019)                                                         | N                                                                              | Y (Zhou et al., 2019)                                                  |
| 50 | KLHL38        | Kelch Like Family Member 38                                                      | -                                                                                                                                                                                           | N                                                                            | N                                                                              | Y (Schleifer et al., 2018; Kuang et al., 2020)                         |
| 51 | LASS3         | Ceramide Synthase 3                                                              | Regulate sphingolipid synthesis by catalyzing the formation of ceramides from sphingoid base and acyl-coA substrates                                                                        | N                                                                            | N                                                                              | Y (Dany et al., 2015; Moro et al., 2018; Brachtendorf et al., 2019)    |
| 52 | LATS1         | Large Tumor Suppressor Kinase 1                                                  | Serine/threonine-protein kinase                                                                                                                                                             | N                                                                            | Y (Xia et al., 2002; Yang et al., 2004; Hao et al., 2008)                      | Y (Ji et al., 2012; Furth et al., 2018)                                |
| 53 | LCOR          | Ligand Dependent Nuclear Receptor Corepressor                                    | Repressor of ligand-dependent transcription activation                                                                                                                                      | N                                                                            | N                                                                              | Y (Jalaguier et al., 2017; Triki et al., 2017; Vogelsang et al., 2020) |
| 54 | LST1          | Leukocyte Specific Transcript 1                                                  | A membrane protein that can inhibit the proliferation of lymphocytes, possible role in immunomodulation                                                                                     | N                                                                            | N                                                                              | Y (Hsu et al., 2019)                                                   |
| 55 | MAGI2         | Membrane Associated Guanylate Kinase, WW And PDZ Domain                          | Act as scaffold molecule at synaptic junctions by assembling neurotransmitter receptors and cell adhesion proteins                                                                          | Putative (Li et al., 2020)                                                   | Y (Thomas et al., 2002; Hu et al., 2007; Berger et al., 2011; Ma et al., 2016) | Y (Mahdian et al., 2014; Valle et al., 2020)                           |

|    |           |                                                         |                                                                                                                                                          |                                                                                                         |                                                                                            |                                                                                     |
|----|-----------|---------------------------------------------------------|----------------------------------------------------------------------------------------------------------------------------------------------------------|---------------------------------------------------------------------------------------------------------|--------------------------------------------------------------------------------------------|-------------------------------------------------------------------------------------|
| 56 | MAP3K2    | Mitogen-Activated Protein Kinase Kinase 2               | Component of protein kinase signal transduction cascade. Mediates activation of the NF-kappa-B, AP1 and DDIT3 transcriptional regulators                 | Y (Mazur et al., 2014; Huang et al., 2016; Wang et al., 2018; Shi et al., 2020)                         | N                                                                                          | N                                                                                   |
| 57 | MNT       | MAX Network Transcriptional Repressor                   | Binds DNA as a heterodimer with MAX and represses transcription.                                                                                         | Y (Link et al., 2012; Link and Hurlin, 2015)                                                            | N                                                                                          | N                                                                                   |
| 58 | MOSC2     | Mitochondrial Amidoxime Reducing Component 2 (MARC2)    | Catalyzes the reduction of N-oxygenated molecules, acting as a counterpart of cytochrome P450 and flavin-containing monoxygenases in metabolic cycles    | Y (Wu et al., 2020)                                                                                     | N                                                                                          | Y (Wu et al., 2020)                                                                 |
| 59 | MUC13     | Mucin 13, Cell Surface Associated                       | Epithelial and hemopoietic transmembrane mucin that may play a role in cell signaling.                                                                   | Y (Sheng et al., 2017; Khan et al., 2017; Kumari et al., 2018; Sheng et al., 2019; Tiemin et al., 2020) | N                                                                                          | Y (Khan et al., 2018; Filippou et al., 2018)                                        |
| 60 | MYO1F     | Unconventional myosin type 1F                           | Use energy from ATP hydrolysis to generate force on actin filaments, works in intracellular environment                                                  | Y (Diquigiovanni et al., 2018)                                                                          | N                                                                                          | Y (Taki et al., 2005)                                                               |
| 61 | NAP1L3    | Nucleosome Assembly Protein 1 Like 3                    | A member of the nucleosome assembly protein (NAP) family                                                                                                 | N                                                                                                       | N                                                                                          | Y (Ross et al., 2015)                                                               |
| 62 | NOP56     | NOP56 Ribonucleoprotein                                 | Involved in 60S ribosomal subunit biogenesis. Core component of snoRNP particles                                                                         | Y (Cowling et al., 2014)                                                                                | N                                                                                          | Y (Gong et al., 2017; Toth et al., 2019)                                            |
| 63 | OFD1      | OFD1 Centriole And Centriolar Satellite Protein         | Component of the centrioles controlling mother and daughter centrioles length                                                                            | N                                                                                                       | N                                                                                          | N                                                                                   |
| 64 | PARVA     | Parvin Alpha                                            | Plays a role in sarcomere organization and in smooth muscle cell contraction                                                                             | Y (Fukuda et al., 2013; Huang et al., 2015; Velazquez-Torres et al., 2018)                              | N                                                                                          | N                                                                                   |
| 65 | PAX8      | Paired Box 8                                            | Involved in thyroid follicular cell development and expression of thyroid-specific genes                                                                 | Y (Kroll et al., 2000; Allison, 2019)                                                                   | N                                                                                          | Y (Nonaka et al., 2008; Wang et al., 2013; Xiang and Kong, 2013; Wang et al., 2015) |
| 66 | PCGF2     | Polycomb Group Ring Finger 2                            | Transcriptional repressor, May play a role in control of cell proliferation and/or neural cell development.                                              | N                                                                                                       | Y (Guo et al., 2007; Lee et al., 2014)                                                     | Y (Zakrzewska et al., 2011)                                                         |
| 67 | PCP2      | Purkinje Cell Protein 2                                 | May function as a cell-type specific modulator for G protein-mediated cell signaling                                                                     | N                                                                                                       | Putative (Yan et al., 2006)                                                                | N                                                                                   |
| 68 | PIGT      | Phosphatidylinositol Glycan Anchor Biosynthesis Class T | Involved in glycosylphosphatidylinositol (GPI)-anchor biosynthesis                                                                                       | Y (Wu et al., 2002; Nagpal et al., 2008)                                                                | N                                                                                          | Y (Wu et al., 2002; Nagpal et al., 2008)                                            |
| 69 | PLCH2     | Phospholipase C Eta 2                                   | Member of the PLC-eta family of the phosphoinositide-specific phospholipase C (PLC) superfamily of enzymes                                               | N                                                                                                       | N                                                                                          | N                                                                                   |
| 70 | PLEKHM1   | Pleckstrin Homology And RUN Domain Containing M1        | Essential for bone resorption, and may play a critical role in vesicular transport in the osteoclast                                                     | N                                                                                                       | N                                                                                          | N                                                                                   |
| 71 | PLOD3     | Procollagen-Lysine,2-Oxoglutarate 5-Dioxygenase 3       | Membrane-bound homodimeric enzyme that catalyzes the hydroxylation of lysyl residues in collagen-like peptide                                            | Y (Baek et al., 2018; Tsai et al., 2018; Baek et al., 2019; Xie et al., 2020)                           | N                                                                                          | Y (Shen et al., 2018)                                                               |
| 72 | PRSS3     | Serine Protease 3                                       | Member of the trypsin family of serine proteases.                                                                                                        | Y (Hockla et al., 2012; Qian et al., 2017; Wang et al., 2019)                                           | Putative (Marsit et al., 2005)                                                             | Y (Qian et al., 2017; Wang et al., 2019)                                            |
| 73 | PSMA6     | Proteasome 20S Subunit Alpha 6                          | Component of the 20S core proteasome complex involved in the proteolytic degradation of intracellular proteins                                           | Y (Kakumu et al., 2017; Bakke et al., 2019)                                                             | N                                                                                          | N                                                                                   |
| 74 | PTPN23    | Protein Tyrosine Phosphatase Non-Receptor Type 23       | may be involved in the regulation of small nuclear ribonucleo protein assembly and pre-mRNA splicing                                                     | N                                                                                                       | Y (Lin et al., 2011; Tanaka et al., 2013; Li et al., 2015; Li et al., 2019)                | Y (Lin et al., 2011; Chen et al., 2020)                                             |
| 75 | RAI1      | Retinoic Acid Induced 1                                 | Transcriptional regulator of the circadian clock components                                                                                              | N                                                                                                       | N                                                                                          | N                                                                                   |
| 76 | RASA2     | RAS P21 Protein Activator 2                             | Inhibitory regulator of the Ras-cyclic AMP pathway.                                                                                                      | N                                                                                                       | Y (Arafah et al., 2015; Arafah et al., 2019)                                               | N                                                                                   |
| 77 | RASAL3    | RAS Protein Activator Like 3                            | Functions as a Ras GTPase-activating protein                                                                                                             | N                                                                                                       | Putative (Mishra et al., 2018; Mishra et al., 2019)                                        | N                                                                                   |
| 78 | REST      | RE1 Silencing Transcription Factor                      | Transcriptional repressor which binds neuron-restrictive silencer element (NRSE) and represses neuronal gene transcription in non-neuronal cells         | Y (Lawinger et al., 2000; Fuller et al., 2005; Huang et al., 2012; Negrini et al., 2013)                | Y (Westbrook et al., 2005; Wagoner et al., 2010; Huang et al., 2012; Negrini et al., 2013) | N                                                                                   |
| 79 | RNF169    | Ring Finger Protein 169                                 | Probable E3 ubiquitin-protein ligase that acts as a negative regulator of double-strand breaks (DSBs) repair                                             | N                                                                                                       | N                                                                                          | Y (An et al., 2017; An et al., 2018)                                                |
| 80 | RTDR1     | Rhabdoid tumor deletion region 1                        | -                                                                                                                                                        | N                                                                                                       | N                                                                                          | Y (Zhou et al., 2000)                                                               |
| 81 | SBNO1     | Strawberry Notch Homolog 1                              | -                                                                                                                                                        | N                                                                                                       | N                                                                                          | N                                                                                   |
| 82 | SERPINB13 | Serpin Family B Member 13                               | A member of the serpin family of serine protease inhibitors, putative role in the proliferation/differentiation of keratinocytes                         | N                                                                                                       | Y (Nakashima et al., 2000; Martin et al., 2008)                                            | Y (Kim et al., 2008; Sahu and Grandis, 2011)                                        |
| 83 | SGMS2     | Sphingomyelin Synthase 2                                | Synthesize the sphingolipid, sphingomyelin, through transfer of the phosphatidyl head group, phosphatidylcholine, on to the primary hydroxyl of ceramide | Y (Zheng et al., 2019)                                                                                  | N                                                                                          | N                                                                                   |

|     |           |                                               |                                                                                                                                |                                                                                                                         |                                             |                                                                                                                               |
|-----|-----------|-----------------------------------------------|--------------------------------------------------------------------------------------------------------------------------------|-------------------------------------------------------------------------------------------------------------------------|---------------------------------------------|-------------------------------------------------------------------------------------------------------------------------------|
| 84  | SIDT1     | SID1 Transmembrane Family Member 1            | Role in RNA transport                                                                                                          | N                                                                                                                       | Y (Wang et al., 2019)                       | Y (Wang et al., 2019)                                                                                                         |
| 85  | SLC4A2    | Solute Carrier Family 4 Member 2              | Plasma membrane anion exchange protein                                                                                         | N                                                                                                                       | N                                           | Y (Yang et al., 2008; Wang et al., 2013)                                                                                      |
| 86  | SPI1      | Spi-1 Proto-Oncogene                          | Binds to PU-box, transcriptional activator specifically involved in the differentiation/activation of macrophages or B-cells.  | Y (Moreau-Gachelin et al., 1988; Nguyen et al., 1990; Ray et al., 1990)                                                 | Y (Özdemir et al., 2018)                    | N                                                                                                                             |
| 87  | SRP9      | Signal Recognition Particle 9                 | Crucial role in targeting secretory proteins to the rough endoplasmic reticulum membrane                                       | N                                                                                                                       | N                                           | Y (Rho et al., 2008)                                                                                                          |
| 88  | STMN1     | Stathmin 1                                    | Microtubule destabilizer protein with an important role in cell cycle progression, cell proliferation, migration and survival. | Y (Chen et al., 2013; Zhang et al., 2020)                                                                               | N                                           | Y (Nemunaitis et al., 2012; Nie et al., 2015; Liu et al., 2017; Verdanet et al., 2017; Shimizu et al., 2019; Li et al., 2019) |
| 89  | STRN      | Striatin                                      | Calmodulin-binding protein which may function as scaffolding or signaling protein                                              | N                                                                                                                       | N                                           | Y (Kusano et al., 2016; Bastos et al., 2018; Du et al., 2020)                                                                 |
| 90  | TARP      | TCR Gamma Alternate Reading Frame Protein     | -                                                                                                                              | Putative (Wolfgang et al., 2000; Wolfgang et al., 2001)                                                                 | N                                           | Y (Fritzsche et al., 2010)                                                                                                    |
| 91  | TBC1D16   | TBC1 Domain Family Member 16                  | May act as a GTPase-activating protein for Rab family protein                                                                  | Putative (Akavia et al., 2010; Vizoso et al., 2015; Rodger et al., 2019)                                                | N                                           | Y (Wouters et al., 2017; Yang et al., 2018)                                                                                   |
| 92  | TECTA     | Tectorin Alpha                                | One of the major non-collagenous components of the tectorial membrane                                                          | N                                                                                                                       | N                                           | Y (Hernández et al., 2007)                                                                                                    |
| 93  | TGM1      | Transglutaminase 1                            | Catalyzes the cross-linking of proteins and the conjugation of polyamines to proteins                                          | N                                                                                                                       | N                                           | Y (Martinet et al., 2003; Huang et al., 2017)                                                                                 |
| 94  | TIPRL     | TOR Signaling Pathway Regulator               | May be an allosteric regulator of serine/threonine-protein phosphatase 2A (PP2A)                                               | N                                                                                                                       | Y (Luan et al., 2020)                       | Y (Song et al., 2012; Jeon et al., 2019; Jun et al., 2019; Xu et al., 2020)                                                   |
| 95  | TMEM54    | Transmembrane Protein 54                      | -                                                                                                                              | N                                                                                                                       | N                                           | N                                                                                                                             |
| 96  | TMPRSS11D | Transmembrane Serine Protease 11D             | Trypsin-like serine protease released from the submucosal serous glands onto mucous membrane                                   | Y (Cao et al., 2017; Yan et al., 2019)                                                                                  | N                                           | Y (Cao et al., 2017; Zhao et al., 2019)                                                                                       |
| 97  | TRIM31    | Tripartite Motif Containing 31                | Functions as an E3 ubiquitin-protein ligase                                                                                    | Y (Sugiura and Miyamoto, 2008; Hatakeyama, 2011; Guo et al., 2018; Yu et al., 2018; Li et al., 2018; Zhou et al., 2019) | Y (Li et al., 2014)                         | Y (Yu et al., 2018)                                                                                                           |
| 98  | USH1C     | USH1 Protein Network Component Harmonin       | Scaffold protein that functions in the assembly of Usher protein complexes                                                     | N                                                                                                                       | N                                           | N                                                                                                                             |
| 99  | VIPR1     | Vasoactive Intestinal Peptide Receptor 1      | A receptor for vasoactive intestinal peptide, a small neuropeptide                                                             | N                                                                                                                       | Y (Mlakar et al., 2010; Zhao et al., 2019b) | Y (Yin et al., 2016; Sun et al., 2020)                                                                                        |
| 100 | WAS       | WASP Actin Nucleation Promoting Factor        | Effector protein for Rho-type GTPases that regulates actin filament reorganization                                             | N                                                                                                                       | Y (Menotti et al., 2019)                    | Y (Ishihara et al., 2013)                                                                                                     |
| 101 | ZDHHC12   | Zinc Finger DHHC-Type Palmitoyltransferase 12 | protein-cysteine S-palmitoyltransferase activity and palmitoyltransferase activity                                             | N                                                                                                                       | N                                           | Y (Chen et al., 2020; Meng et al., 2020)                                                                                      |
| 102 | ZDHHC20   | Zinc Finger DHHC-Type Palmitoyltransferase 20 | Catalyzes palmitoylation of Cys residues on target proteins                                                                    | Y (Ducker et al., 2004; Draper and Smith, 2010; Jung et al., 2017)                                                      | N                                           | N                                                                                                                             |
| 103 | ZNF814    | zinc finger protein 814                       | Nucleic acid binding                                                                                                           | N                                                                                                                       | N                                           | Y (Karasaki et al., 2016; Ma et al., 2017)                                                                                    |

**Table S2** - Abbreviations used for the 31 different cancer types used in our analysis

| <b>Abbreviation</b> | <b>Cancer Type</b>                                               |
|---------------------|------------------------------------------------------------------|
| LAML                | acute myeloid leukaemia                                          |
| ACC                 | adrenocortical carcinoma                                         |
| BLCA                | bladder urothelial carcinoma                                     |
| LGG                 | brain lower grade glioma                                         |
| BRCA                | breast invasive carcinoma                                        |
| CESC                | cervical squamous cell carcinoma and endocervical adenocarcinoma |
| CHOL                | cholangiocarcinoma                                               |
| COAD                | colon adenocarcinoma                                             |
| UCEC                | corpus endometrioid carcinoma                                    |
| ESCA                | oesophageal carcinoma                                            |
| GBM                 | glioblastoma multiforme                                          |
| HNSC                | head & neck squamous cell carcinoma                              |
| KIRC                | kidney renal clear cell carcinoma                                |
| KIRP                | kidney renal papillary cell carcinoma                            |
| LIHC                | liver hepatocellular carcinoma                                   |
| LUAD                | lung adenocarcinoma                                              |
| LUSC                | lung squamous cell carcinoma                                     |
| DLBC                | lymphoid neoplasm diffuse large B-cell lymphoma                  |
| MESO                | Mesothelioma                                                     |
| OV                  | ovarian serous cystadenocarcinoma                                |
| PAAD                | pancreatic adenocarcinoma                                        |
| PCPG                | pheochromocytoma and paraganglioma                               |
| PRAD                | prostate adenocarcinoma                                          |
| READ                | rectum adenocarcinoma                                            |
| SKCM                | skin cutaneous melanoma                                          |
| STAD                | stomach adenocarcinoma                                           |
| TGCT                | testicular germ cell tumour                                      |
| THYM                | thymoma                                                          |
| THCA                | thyroid carcinoma                                                |
| UCS                 | uterine carcinosarcoma                                           |
| UVM                 | uveal melanoma                                                   |

**Table S3** - Number of training and testing samples for each cancer type in our analysis

| <b>Cancer type</b> | <b>No. of Samples</b> |             |
|--------------------|-----------------------|-------------|
|                    | <b>Train</b>          | <b>Test</b> |
| LAML               | 138                   | 35          |
| ACC                | 63                    | 16          |
| BLCA               | 340                   | 86          |
| LGG                | 424                   | 106         |
| BRCA               | 974                   | 244         |
| CESC               | 246                   | 62          |
| CHOL               | 36                    | 9           |
| COAD               | 263                   | 66          |
| UCEC               | 160                   | 41          |
| ESCA               | 156                   | 40          |
| GBM                | 137                   | 35          |
| HNSC               | 452                   | 114         |
| KIRC               | 484                   | 122         |
| KIRP               | 258                   | 65          |
| LIHC               | 338                   | 85          |
| LUAD               | 460                   | 116         |
| LUSC               | 442                   | 111         |
| DLBC               | 38                    | 10          |
| MESO               | 69                    | 18          |
| OV                 | 246                   | 62          |
| PAAD               | 146                   | 37          |
| PCPG               | 149                   | 38          |
| PRAD               | 440                   | 110         |
| READ               | 84                    | 21          |
| SKCM               | 379                   | 95          |
| STAD               | 360                   | 90          |
| TGCT               | 124                   | 32          |
| THYM               | 97                    | 25          |
| THCA               | 457                   | 115         |
| UCS                | 45                    | 12          |
| UVM                | 64                    | 16          |

**Table S4** - List of genes for each cancer type that showed combined precision and recall values greater than 0.75

| <b>Cancer Type</b> | <b>Genes</b>                                                                                 |
|--------------------|----------------------------------------------------------------------------------------------|
| LAML               | <i>TMEM54</i>                                                                                |
| PRAD               | <i>TARP</i>                                                                                  |
| LGG                | <i>ATP1B2, ATPV1G2</i>                                                                       |
| THCA               | <i>FOXE1, PAX8</i>                                                                           |
| KIRC               | <i>PAX8, BHMT2, FASN</i>                                                                     |
| LIHC               | <i>MOSC2, HGD, DDR1</i>                                                                      |
| BRCA               | <i>DEFB132, CREB3L4, GDA, SIDT1, KLHL38</i>                                                  |
| KIRP               | <i>KCP, RTDR1, GDA, C1orf21, CBFA2T3, ASNSD1</i>                                             |
| STAD               | <i>LCOR, EPS8L3, MUC13, TRIM31, ZDHHC20, PRSS3, EFNA2, GPN3, ASXL2, LATS1, PSMA6</i>         |
| SKCM               | <i>CABLES1, TBC1D16, PLOD3, VIPR1, SLC4A2, GOLGA2B, PTPN23, PLCH2, RAI1, HGD, SRP9, GJA1</i> |







Talhouk RS, Fares MB, Rahme GJ, et al. Context dependent reversion of tumor phenotype by connexin-43 expression in MDA-MB231 cells and MCF-7 cells: role of  $\beta$ -catenin/connexin43 association. *Exp Cell Res.* 2013;319(20):3065-3080. doi:10.1016/j.yexcr.2013.10.002

Tanaka K, Kondo K, Kitajima K, Muraoka M, Nozawa A, Hara T. Tumor-suppressive function of protein-tyrosine phosphatase non-receptor type 23 in testicular germ cell tumors is lost upon overexpression of miR142-3p microRNA. *J Biol Chem.* 2013;288(33):23990-23999. doi:10.1074/jbc.M113.478891

Teleki I, Szasz AM, Maros ME, et al. Correlations of differentially expressed gap junction connexins Cx26, Cx30, Cx32, Cx43 and Cx46 with breast cancer progression and prognosis. *PLoS One.* 2014;9(11):e112541. Published 2014 Nov 10. doi:10.1371/journal.pone.0112541

Terrasi A, Bertolini I, Martelli C, et al. Specific V-ATPase expression sub-classes IDHW1 lower-grade gliomas and impacts glioma growth in vivo. *EBioMedicine.* 2019;41:214-224. doi:10.1016/j.ebiom.2019.01.052

Thomas M, Laura R, Hepner K, et al. Oncogenic human papillomavirus E6 proteins target the MAGI-2 and MAGI-3 proteins for degradation. *Oncogene.* 2002;21(33):5088-5096. doi:10.1038/sj.onc.1205668

Tiemin P, Fanzheng M, Peng X, et al. MUC13 promotes intrahepatic cholangiocarcinoma progression via EGFR/P13K/AKT pathways. *J Hepatol.* 2020;72(4):761-773. doi:10.1016/j.jhep.2019.11.021

Toth R, Schiffmann H, Hube-Maggs C, et al. Random forest-based modelling to detect biomarkers for prostate cancer progression. *Clin Epigenetics.* 2019;11(1):148. Published 2019 Oct 22. doi:10.1186/s13148-019-0736-8

Triki M, Ben Ayed-Guerfali D, Sagueim L, et al. RPI140 and LCoR expression in gastrointestinal cancers. *Oncotarget.* 2017;8(67):111161-111175. Published 2017 Nov 25. doi:10.18632/oncotarget.22686

Tsai CK, Huang LC, Tsaui WC, Huang SM, Lee JT, Huang DY. Overexpression of PLOD3 promotes tumor progression and poor prognosis in gliomas. *Oncotarget.* 2018;9(21):15705-15720. Published 2018 Feb 28. doi:10.18632/oncotarget.24594

Valiathan RR, Marco M, Leitingger B, Kleer CG, Fridman R. Discoidin domain receptor tyrosine kinases: new players in cancer progression. *Cancer Metastasis Rev.* 2012;31(1-2):295-321. doi:10.1007/s10555-012-9346-2

Valls BL, Rodriguez-Torres S, Kuhn E, et al. HIST1H2BB and MAGI2 Methylation and Somatic Mutations as Precision Medicine Biomarkers for Diagnosis and Prognosis of High-grade Serous Ovarian Cancer [published online ahead of print, 2020 Jun 24]. *Cancer Prev Res (Phila).* 2020;10.1158/1940-6207.CAPR-19-0412. doi:10.1158/1940-6207.CAPR-19-0412

van den Boom J, Wolter M, Blaschke B, Knobbe CB, Reifemberger G. Identification of novel genes associated with astrocytoma progression using suppression subtractive hybridization and real-time reverse transcription-polymerase chain reaction. *Int J Cancer.* 2006;119(10):2330-2338. doi:10.1002/ijc.22108

Velasquez-Torres G, Shoshan E, Ivan C, et al. A-to-I miR-378a-3p editing can prevent melanoma progression via regulation of PARVA expression. *Nat Commun.* 2018;9(1):461. Published 2018 Jan 31. doi:10.1038/s41467-018-02851-7

Verdanet E, Dereure O, René C, et al. Diagnostic value of STMN1, LMO2, HGAL, AID expression and lp36 chromosomal abnormalities in primary cutaneous B cell lymphomas. *Histopathology.* 2017;71(4):648-660. doi:10.1111/his.13279

Visca P, Sebastiani V, Botti C, et al. Fatty acid synthase (FAS) is a marker of increased risk of recurrence in lung carcinoma. *Anticancer Res.* 2004;24(6):4169-4173.

Vizzoso M, Ferreira HJ, Lopez-Serra P, et al. Epigenetic activation of a cryptic TBC1D16 transcript enhances melanoma progression by targeting EGFR. *Nat Med.* 2015;21(7):741-750. doi:10.1038/nm.3863

Vogelsang TLR, Schmeckel E, Kuhn C, et al. Regulation of LCoR and RPI140 expression in cervical intraepithelial neoplasia and correlation with CIN progression and deafferentiation. *J Cancer Res Clin Oncol.* 2020;146(7):1847-1855. doi:10.1007/s00432-020-03178-x

Wagner MP, Gunsalus KT, Schoenike B, Richardson AL, Friedl A, Roopra A. The transcription factor REST is lost in aggressive breast cancer. *PLoS Genet.* 2010;6(6):e1000979. Published 2010 Jun 10. doi:10.1371/journal.pgen.1000979

Walts AE, Said JW, Siegel MB, Banks-Schlegel S. Involucrin, a marker of squamous and urothelial differentiation. An immunohistochemical study on its distribution in normal and neoplastic tissues. *J Pathol.* 1985;145(4):329-340. doi:10.1002/path.1711450406

Wang C, Yang Y, Yin L, et al. Novel Potential Biomarkers Associated With Epithelial to Mesenchymal Transition and Bladder Cancer Prognosis Identified by Integrated Bioinformatic Analysis. *Front Oncol.* 2020;10:931. Published 2020 Jun 30. doi:10.3389/fonc.2020.00931

Wang F, Hu YL, Feng Y, et al. High-level expression of PRSS3 correlates with metastasis and poor prognosis in patients with gastric cancer. *J Surg Oncol.* 2019;119(8):1108-1121. doi:10.1002/jso.25448

Wang LL, Zhang M, miR-582-5p is a potential prognostic marker in human non-small cell lung cancer and functions as a tumor suppressor by targeting MAP3K2. *Eur Rev Med Pharmacol Sci.* 2018;22(22):7760-7767. doi:10.26355/eurrev\_201811\_16397

Wang M, Ma H, Pan Y, et al. PAX2 and PAX8 reliably distinguishes ovarian serous tumors from mucinous tumors. *Appl Immunohistochem Mol Morphol.* 2015;23(4):280-287. doi:10.1097/PAL0000000000000065

Wang T, Zhao L, Yang Y, et al. EGR1 is critical for gastrin-dependent upregulation of anion exchanger 2 in gastric cancer cells. *FEBS J.* 2013;280(1):174-183. doi:10.1111/febs.12058

Wang Y, Li H, Ma J, et al. Integrated Bioinformatics Data Analysis Reveals Prognostic Significance Of SIDT1 In Triple-Negative Breast Cancer. *Oncotargets Ther.* 2019;12:8401-8410. Published 2019 Oct 11. doi:10.2147/OTT.S215898

Wang Y, Wang Y, Li J, et al. PAX8: a sensitive and specific marker to identify cancer cells of ovarian origin for patients prior to neoadjuvant chemotherapy. *J Hematol Oncol.* 2013;6:60. Published 2013 Aug 19. doi:10.1186/1756-8722-6-60

Westbrook TF, Martin ES, Schlabach MR, et al. A genetic screen for candidate tumor suppressors identifies REST. *Cell.* 2005;121(6):837-848. doi:10.1016/j.cell.2005.03.033

Wolfgang CD, Essand M, Lee B, Pastan I. T-cell receptor gamma chain alternate reading frame protein (TARF) expression in prostate cancer cells leads to an increased growth rate and induction of caveolins and amphiregulin. *Cancer Res.* 2001;61(22):8122-8126.

Wolfgang CD, Essand M, Vincent JJ, Lee B, Pastan I. TARF: a nuclear protein expressed in prostate and breast cancer cells derived from an alternate reading frame of the T cell receptor gamma chain locus. *Proc Natl Acad Sci U S A.* 2000;97(17):9437-9442. doi:10.1073/pnas.160270597

Wouters J, Vizzoso M, Martinez-Cardus A, et al. Comprehensive DNA methylation study identifies novel progression-related and prognostic markers for cutaneous melanoma. *BMC Med.* 2017;15(1):101. Published 2017 Jun 5. doi:10.1186/s12916-017-0851-3

Wu D, Wang Y, Yang G, et al. A novel mitochondrial amidoxime reducing component 2 is a favorable indicator of cancer and suppresses the progression of hepatocellular carcinoma by regulating the expression of p27 [published online ahead of print, 2020 Aug 18]. *Oncogene.* 2020;10.1038/s41388-020-01417-6. doi:10.1038/s41388-020-01417-6

Wu G, Guo Z, Chatterjee A, et al. Overexpression of glycosylphosphatidylinositol (GPI) transamidase subunit phosphatidylinositol glycan class T and/or GPI anchor attachment 1 induces tumorigenesis and contributes to invasion in human breast cancer. *Cancer Res.* 2006;66(20):9829-9836. doi:10.1158/0008-5472.CAN-06-0506

Wu L, Peng CW, Hou JX, et al. Corin-1C is a novel biomarker for hepatocellular carcinoma invasive progression identified by proteomics analysis and clinical validation. *J Exp Clin Cancer Res.* 2010;29(1):17. Published 2010 Feb 24. doi:10.1186/1756-9966-29-17

Xia H, Qi H, Li Y, et al. LATS1 tumor suppressor regulates G2/M transition and apoptosis. *Oncogene.* 2002;21(8):1233-1241. doi:10.1038/sj.onc.1205174

Xiang L, Kong B. PAX8 is a novel marker for differentiating between various types of tumor, particularly ovarian epithelial carcinomas. *Oncol Lett.* 2013;5(3):735-738. doi:10.3892/ol.2013.1121

Xie D, Li J, Wei S, et al. Knockdown of PLOD3 suppresses the malignant progression of renal cell carcinoma via reducing TWIST1 expression [published online ahead of print, 2020 Jun 22]. *Mol Cell Probes.* 2020;101608. doi:10.1016/j.mcp.2020.101608

Xu K, Mao X, Mehta M, et al. Elucidation of low cancer cells avoid acidosis through comparative transcriptomic data analysis. *PLoS One.* 2013;8(8):e71177. Published 2013 Aug 14. doi:10.1371/journal.pone.0071177

Xu X, Zhu H, Yang M, et al. Knockdown of TOR signaling pathway regulator suppresses cell migration and invasion in non-small cell lung cancer via the regulation of epithelial-to-mesenchymal transition. *Exp Ther Med.* 2020;19(3):1925-1932. doi:10.3892/etm.2019.8358

Xu Y, Wu G, Li J, et al. Screening and Identification of Key Biomarkers for Bladder Cancer: A Study Based on TCGA and GEO Data. *Biomed Res Int.* 2020;2020:8283401. Published 2020 Jan 23. doi:10.1155/2020/8283401

Xuan Z, Zhao L, Li Z, et al. EPRS3L3 promotes hepatocellular carcinoma proliferation and metastasis by modulating EGFR dimerization and internalization. *Am J Cancer Res.* 2020;10(1):60-77. Published 2020 Jan 1.

Yan HX, Yang W, Zhang R, et al. Protein-tyrosine phosphatase PCP-2 inhibits beta-catenin signaling and increases E-cadherin-dependent cell adhesion. *J Biol Chem.* 2006;281(22):15423-15433. doi:10.1074/jbc.M602607200

Yan K, Hu C, Liu C, Chu G, Wang X, Mac S, Li L. Knockdown of TMPPRSS11D inhibits the proliferation, migration and invasion of cervical cancer cells. *RSC Adv.* 2019; 9:21591

Yang X, Yu K, Hao Y, et al. LATS1 tumour suppressor affects cytokinesis by inhibiting LIMK1. *Nat Cell Biol.* 2004;6(7):609-617. doi:10.1038/ncb1140

Yang Y, Wu PP, Wu J, et al. Expression of anion exchanger 2 in human gastric cancer. *Exp Oncol.* 2008;30(1):81-87.

Yang Z, Shen H, He W, et al. Expression of TBC1D16 Is Associated with Favorable Prognosis of Epithelial Ovarian Cancer. *Tohoku J Exp Med.* 2018;245(3):141-148. doi:10.1620/tjem.245.141

Yin F, Shi L, Liu X, et al. Microarray-based identification of genes associated with cancer progression and prognosis in hepatocellular carcinoma. *J Exp Clin Cancer Res.* 2016;35(1):127. Published 2016 Aug 27. doi:10.1186/s13046-016-0403-2

Yoshihara K, Wang Q, Torres-Garcia W, et al. The landscape and therapeutic relevance of cancer-associated transcription fusions. *Oncogene.* 2015;34(37):4845-4854. doi:10.1038/onc.2014.406

Yu C, Chen S, Guo Y, Sun C. Oncogenic TRIM31 confers gemcitabine resistance in pancreatic cancer via activating the NF- $\kappa$ B signaling pathway. *Theranostics.* 2018;8(12):3224-3236. Published 2018 May 11. doi:10.7150/thno.23259

Zakrzewska M, Zakrzewski K, Gręśner SM, Piaskowski S, Zalewska-Szewczyk B, Liberski PP. Polycyomb genes expression as a predictor of poor clinical outcome in children with medulloblastoma. *Childs Nerv Syst.* 2011;27(1):79-86. doi:10.1007/s00381-010-1260-5

Zeng CX, Tang LY, Xie CY, et al. Overexpression of EPRS3L3 promotes cell proliferation by inhibiting the transactivity of FOXO1 in HCC. *Neoplasma.* 2018;65(5):701-707. doi:10.4149/neo\_2018\_170725NS03

Zhang Q, Han Q, Zi J, Song C, Ge Z. CD37 high expression as a potential biomarker and association with poor outcome in acute myeloid leukemia. *Biosci Rep.* 2020;40(5):BSR20200008. doi:10.1042/BSR20200008

Zhang R, Gao X, Zuo J, et al. STMN1 upregulation mediates hepatocellular carcinoma and hepatic stellate cell crosstalk to aggravate cancer by triggering the MET pathway. *Cancer Sci.* 2020;111(2):406-417. doi:10.1111/cas.14262

Zhao L, Chi W, Cao H, et al. Screening and clinical significance of tumor markers in head and neck squamous cell carcinoma through bioinformatics analysis. *Mol Med Rep.* 2019;19(1):143-154. doi:10.3892/mmr.2018.9639

Zhao L, Yu Z, Zhao B. Mechanism of VPR1 gene regulating human lung adenocarcinoma H1299 cells. *Med Oncol.* 2019b;36(11):91. Published 2019 Sep 27. doi:10.1007/s12032-019-1312-y

Zheng K, Chen Z, Feng H, et al. Sphingomyelin synthase 2 promotes an aggressive breast cancer phenotype by disrupting the homeostasis of ceramide and sphingomyelin. *Cell Death Dis.* 2019;10(3):157. Published 2019 Feb 15. doi:10.1038/s41419-019-1303-0

Zhou J, Fogelgren B, Wang Z, Roe BA, Biegel JA. Isolation of genes from the rhabdoid tumor deletion region in chromosome band 22q11.2. *Gene.* 2000;241(1):133-141. doi:10.1016/s0378-1119(99)00456-4

Zhou L, Deng ZZ, Li HY, et al. TRIM31 promotes glioma proliferation and invasion through activating NF- $\kappa$ B pathway. *Oncotargets Ther.* 2019;12:2289-2297. Published 2019 Mar 27. doi:10.2147/OTT.S183625

Zhou M, Fan J, Li Z, et al. Prognostic impact of tumor mutation burden and the mutation in KIAA1211 in small cell lung cancer. *Respir Res.* 2019;20(1):248. Published 2019 Nov 7. doi:10.1186/s12931-019-1205-9
